# Supplementary material for: Efficient synthesis of amides from secondary alcohols and CH 3 CN promoted by Fe(NO 3 ) 3 ·9H 2 O
Source: Royal Society of Chemistry journal article supplement (doi:10.1039/d4ra04146a), 2024-01-01
Supplement: d4ra04146a1.pdf [file d4ra04146a1.pdf]

# Supporting Information

## I. General experimental details

### 1.1. Materials

All of the materials were purchased from Beijing Innochem Company, and used as received.

### 1.2 Characterization

Some products were purified by flashchromatography on silica gel. 1-phenylethyl acetate: analysis of crude reaction mixture was performed on a SHIMADZU 2030 GC System with a HPINNOWAX capillary column (30 m×0.25 mm×0.32 μm) and an FID detector. The following GC temperature program was used: 45°C is maintained for 2 minutes, rises to 280 °C at 15 °C/min, and hold for 5 minutes. Nitrogen was used as a carrier gas. The injector temperature was held at 250 °C. <sup>1</sup>H-NMR and <sup>13</sup>C-NMR spectra spectra were acquired on a 400 MHz JNM-ECZ400S/L1 instrument. Chemical shifts were reported in ppm relative to a peak of a residual protiated solvent (CDCl<sub>3</sub> or DMSO).

### 1.3 General procedures for typical procedure

Typical procedure: iron iron nitrate as catalyst, add the required amount of primary alcohol bottom (0.5 mmol) and iron nitrate (0.5 mmol, acetonitrile (3 mL) to 10 mL reaction tube (open air), and complete the reaction within 80°C set time. After cooling to room temperature, wash with 3ml of saturated salt water and the solution is extracted with dichloromethane (3×3 mL). The desired product was purified by column chromatography on 200-300-mesh silica gel using ethyl acetate / petroleum ether as the elution agent. Some of the products are as follows: the combined substrate by GC / FID method, with dodecane as the internal standard for quantitative identification of the standard substrate.

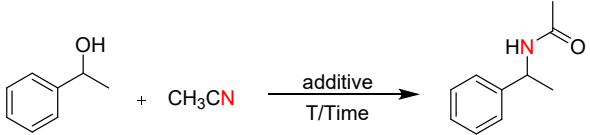

| Entry | Additive (mmol)                                              | T/°C | Time (h) | Yield (%) |
|-------|--------------------------------------------------------------|------|----------|-----------|
| 1     | Fe(NO <sub>3</sub> ) <sub>3</sub> ·9H <sub>2</sub> O (0.025) | 80   | 3        | 24.7      |
| 2     | Fe(NO <sub>3</sub> ) <sub>3</sub> ·9H <sub>2</sub> O (0.05)  | 80   | 3        | 41.6      |
| 3     | Fe(NO <sub>3</sub> ) <sub>3</sub> ·9H <sub>2</sub> O (0.075) | 80   | 3        | 46.2      |
| 4     | Fe(NO <sub>3</sub> ) <sub>3</sub> ·9H <sub>2</sub> O (0.1)   | 50   | 3        | 50.5      |

Condition: substrate (0.5 mmol), CH<sub>3</sub>CN (3 mL), GC yield.

Table S1. Optimization of reaction condition

Table S2. Optimization of reaction temperature condition in 1-(4-methoxyphenyl) ethanol <sup>[a]</sup>

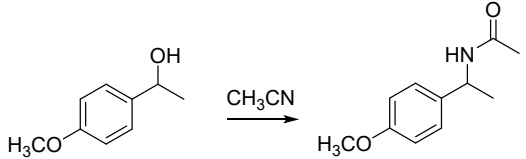

| Entry | T/°C | Yield (%) |
|-------|------|-----------|
| 1     | rt   | 67.4      |
| 2     | 35   | 64.0      |
| 3     | 50   | 90.3      |
| 4     | 65   | 96.5      |
| 5     | 80   | 86.5      |

Condition: substrate (0.5 mmol), CH<sub>3</sub>CN (3 mL), Fe(NO<sub>3</sub>)<sub>3</sub>·9H<sub>2</sub>O (0.5 mmol), 3h, GC yield.

## II. Data of <sup>1</sup>H NMR and <sup>13</sup>C NMR of products

**N-(1-phenylethyl)acetamide (table 2-1)<sup>1</sup>:** white solid. Yield: 96.2%. <sup>1</sup>H NMR (400 MHz, CDCl<sub>3</sub>) δ 7.39 – 7.19 (m, 5H), 6.15 (s, 1H), 5.10 (p, *J* = 7.1 Hz, 1H), 1.94 (s, 3H), 1.46 (d, *J* = 6.9 Hz, 3H). <sup>13</sup>C NMR (101 MHz, CDCl<sub>3</sub>) δ 169.76, 143.10, 128.80, 127.54, 126.31, 77.48, 77.16, 76.84, 49.05, 23.37, 21.77.

**N-(1-phenylpropyl)acetamide (table 2-2)<sup>1</sup>:** white solid. Yield: 95.1%. <sup>1</sup>H NMR (400 MHz, CDCl<sub>3</sub>) δ 7.47 – 7.17 (m, 5H), 5.83 (d, *J* = 7.7 Hz, 1H), 4.86 (q, *J* = 7.6 Hz, 1H), 1.97 (s, 3H), 1.84 – 1.77 (m, 1H), 0.86 (t, *J* = 7.4 Hz, 3H). <sup>13</sup>C NMR (101 MHz, CDCl<sub>3</sub>) δ 169.68, 142.08, 128.74, 127.46, 126.75, 77.45, 77.13, 76.81, 55.10, 29.12, 23.49, 10.81.

**N-(1-phenylpentyl)acetamide (table 2-3)<sup>2</sup>:** white solid. Yield: 93.5%. <sup>1</sup>H NMR (400 MHz, CDCl<sub>3</sub>) δ 7.44 – 7.20 (m, 5H), 5.85 (d, *J* = 8.5 Hz, 1H), 4.92 (q, *J* = 7.6 Hz, 1H), 1.96 (s, 3H), 1.82

- 1.70 (m, 2H), 1.33 – 1.17 (m, 4H), 0.84 (t,  $J = 7.1$  Hz, 3H).  $^{13}\text{C}$  NMR (101 MHz,  $\text{CDCl}_3$ )  $\delta$  169.35, 140.26, 137.19, 129.44, 126.25, 77.48, 77.16, 76.84, 48.66, 23.53, 21.76, 21.14.

**N-(1,2,3,4-tetrahydronaphthalen-1-yl)acetamide(table 2-4)<sup>1</sup>**: white solid. Yield: 85.7%.  $^1\text{H}$  NMR (400 MHz,  $\text{CDCl}_3$ )  $\delta$  7.26 – 7.05 (m, 4H), 5.75 (d,  $J = 8.5$  Hz, 1H), 5.15 (h,  $J = 4.0, 3.2$  Hz, 1H), 2.76 (dtd,  $J = 9.5, 6.3, 2.8$  Hz, 2H), 2.07 – 1.93 (m, 1H), 1.98 (s, 3H), 1.84 – 1.76 (m, 3H).  $^{13}\text{C}$  NMR (101 MHz,  $\text{CDCl}_3$ )  $\delta$  169.59, 142.50, 128.77, 127.45, 126.72, 77.48, 77.16, 76.84, 53.67, 36.00, 28.47, 23.53, 22.57, 14.05.

**N-(2-methyl-1-phenylpropyl)acetamide(table 2-5)<sup>3</sup>**: white solid. Yield: 87.5%.  $^1\text{H}$  NMR (400 MHz,  $\text{CDCl}_3$ )  $\delta$  7.40 – 7.20 (m, 5H), 6.00 (d,  $J = 9.2$  Hz, 1H), 4.74 (dd,  $J = 9.1, 8.1$  Hz, 1H), 2.06 – 2.00 (m, 1H), 1.99 (s, 3H), 0.96 (d,  $J = 6.7$  Hz, 3H), 0.81 (d,  $J = 6.7$  Hz, 3H).  $^{13}\text{C}$  NMR (101 MHz,  $\text{CDCl}_3$ )  $\delta$  169.72, 141.67, 128.56, 127.25, 127.09, 77.48, 77.16, 76.84, 59.34, 33.48, 23.52, 19.84, 18.99.

**N-(2-phenylpropan-2-yl)acetamide(table 2-6)<sup>7</sup>**: white solid. Yield: 77.1%.  $^1\text{H}$  NMR (400 MHz,  $\text{CDCl}_3$ )  $\delta$  7.41 – 7.18 (m, 5H), 5.88 (s, 1H), 1.96 (s, 3H), 1.69 (s, 6H).  $^{13}\text{C}$  NMR (101 MHz,  $\text{CDCl}_3$ )  $\delta$  169.50, 146.90, 128.49, 126.77, 124.84, 77.48, 77.16, 76.84, 56.05, 29.17, 24.37.

**N-(1,2-diphenylethyl)acetamide(table 2-7)<sup>8</sup>**: white solid. Yield: 43.1%.  $^1\text{H}$  NMR (400 MHz,  $\text{CDCl}_3$ )  $\delta$  7.32 – 7.12 (m, 8H), 7.03 (d,  $J = 7.2$  Hz, 2H), 5.90 (d,  $J = 8.0$  Hz, 1H), 5.26 (q,  $J = 7.4$  Hz, 1H), 3.09 (d,  $J = 7.1$  Hz, 2H), 1.92 (s, 3H).  $^{13}\text{C}$  NMR (101 MHz,  $\text{CDCl}_3$ )  $\delta$  169.60, 141.50, 137.34, 129.39, 128.67, 128.44, 127.53, 126.73, 77.45, 77.14, 76.82, 54.55, 42.58, 23.43.

**N-(1-(4-methoxyphenyl)ethyl)acetamide(table 2-8)<sup>3</sup>**: white solid. Yield: 96.5%.  $^1\text{H}$  NMR (400 MHz,  $\text{CDCl}_3$ )  $\delta$  7.29 – 7.15 (m, 2H), 6.90 – 6.77 (m, 2H), 6.09 (d,  $J = 8.1$  Hz, 1H), 5.04 (p,  $J = 7.1$  Hz, 1H), 3.77 (s, 3H), 1.93 (s, 3H), 1.43 (d,  $J = 6.9$  Hz, 3H).  $^{13}\text{C}$  NMR (101 MHz,  $\text{CDCl}_3$ )  $\delta$  169.22, 158.84, 135.49, 127.45, 114.01, 77.48, 77.16, 76.84, 55.34, 48.22, 23.42, 21.71.

**N-(1-(2-methoxyphenyl)ethyl)acetamide(table 2-9)<sup>3</sup>**: white solid. Yield: 85.6%.  $^1\text{H}$  NMR (400 MHz,  $\text{CDCl}_3$ )  $\delta$  7.30 – 7.13 (m, 2H), 6.97 – 6.81 (m, 2H), 6.42 (d,  $J = 8.9$  Hz, 1H), 5.24 (dq,  $J = 8.7, 6.9$  Hz, 1H), 3.86 (s, 3H), 1.94 (s, 3H), 1.42 (d,  $J = 6.9$  Hz, 3H).  $^{13}\text{C}$  NMR (101 MHz,  $\text{CDCl}_3$ )  $\delta$  168.91, 157.16, 130.95, 128.56, 128.19, 121.01, 111.18, 77.48, 77.16, 76.84, 55.44, 47.46, 23.73, 21.54.

**N-(1-(3-methoxyphenyl)ethyl)acetamide(table 2-10)<sup>2</sup>**: white solid. Yield: 83.4%.  $^1\text{H}$  NMR (400 MHz,  $\text{CDCl}_3$ )  $\delta$  7.25 (t,  $J = 7.9$  Hz, 1H), 6.92 – 6.76 (m, 3H), 5.82 (s, 1H), 5.08 (hept,  $J = 7.9$  Hz,

1H), 3.80 (s, 3H), 1.97 (s, 3H), 1.46 (dd,  $J = 6.9, 0.8$  Hz, 3H).  $^{13}\text{C}$  NMR (101 MHz,  $\text{CDCl}_3$ )  $\delta$  169.24, 159.96, 144.96, 129.88, 118.54, 112.59, 112.42, 77.48, 77.16, 76.84, 55.37, 48.92, 23.59, 21.85.

**N-(1-(naphthalen-2-yl)ethyl)acetamide(table 2-11)<sup>1</sup>**: white solid. Yield: 97.3%.  $^1\text{H}$  NMR (400 MHz,  $\text{CDCl}_3$ )  $\delta$  7.83 – 7.73 (m, 4H), 7.54 – 7.37 (m, 3H), 6.02 (s, 1H), 5.28 (p,  $J = 7.2$  Hz, 1H), 2.00 (s, 3H), 1.56 (d,  $J = 6.9$  Hz, 3H).  $^{13}\text{C}$  NMR (101 MHz,  $\text{CDCl}_3$ )  $\delta$  169.62, 140.53, 133.41, 132.82, 128.61, 127.98, 127.72, 126.37, 126.03, 124.84, 124.66, 77.48, 77.16, 76.84, 49.00, 23.51, 21.71.

**N-(1-(naphthalen-1-yl)ethyl)acetamide(table 2-12)<sup>3</sup>**: white solid. Yield: 90.2%.  $^1\text{H}$  NMR (400 MHz,  $\text{CDCl}_3$ )  $\delta$  8.09 (d,  $J = 8.0$  Hz, 1H), 7.89 – 7.83 (m, 1H), 7.79 (d,  $J = 7.3$  Hz, 1H), 7.61 – 7.38 (m, 4H), 5.93 – 5.89 (m, 1H), 5.84 (s, 1H), 1.95 (s, 3H), 1.66 (d,  $J = 6.5$  Hz, 3H).  $^{13}\text{C}$  NMR (101 MHz,  $\text{CDCl}_3$ )  $\delta$  169.12, 138.30, 134.03, 131.23, 128.89, 128.52, 126.72, 126.01, 125.30, 123.55, 122.67, 77.48, 77.16, 76.84, 44.73, 23.46, 20.73.

**N-(1-([1,1'-biphenyl]-4-yl)ethyl)acetamide(table 2-13)<sup>1</sup>**: white solid. Yield: 95.6%.  $^1\text{H}$  NMR (400 MHz,  $\text{CDCl}_3$ )  $\delta$  7.55 (dd,  $J = 8.5, 2.2$  Hz, 4H), 7.49 – 7.29 (m, 5H), 5.86 (s, 1H), 5.16 (p,  $J = 7.1$  Hz, 1H), 1.99 (s, 3H), 1.51 (d,  $J = 6.9$  Hz, 3H).  $^{13}\text{C}$  NMR (101 MHz,  $\text{CDCl}_3$ )  $\delta$  169.33, 142.32, 140.84, 140.48, 128.91, 127.54, 127.44, 127.19, 126.77, 77.48, 77.16, 76.84, 48.64, 23.59, 21.82.

**N-(1-(p-tolyl)ethyl)acetamide(table 2-14)<sup>2</sup>**: white solid. Yield: 97.1%.  $^1\text{H}$  NMR (400 MHz,  $\text{CDCl}_3$ )  $\delta$  7.44 – 7.20 (m, 5H), 5.85 (d,  $J = 8.5$  Hz, 1H), 4.92 (q,  $J = 7.6$  Hz, 1H), 1.96 (s, 2H), 1.88 – 1.68 (m, 2H), 1.34 – 1.16 (m, 4H), 0.84 (t,  $J = 7.1$  Hz, 3H).  $^{13}\text{C}$  NMR (101 MHz,  $\text{CDCl}_3$ )  $\delta$  169.59, 142.50, 128.77, 127.45, 126.72, 77.48, 77.16, 76.84, 53.67, 36.00, 28.47, 23.53, 22.57, 14.05.

**N-(1-(o-tolyl)ethyl)acetamide(table 2-15)<sup>3</sup>**: white solid. Yield: 93.7%.  $^1\text{H}$  NMR (400 MHz,  $\text{CDCl}_3$ )  $\delta$  7.54 – 7.02 (m, 4H), 5.79 (s, 1H), 5.35 – 5.23 (m, 1H), 2.37 (s, 3H), 1.96 (s, 3H), 1.46 (d,  $J = 6.8$  Hz, 3H).  $^{13}\text{C}$  NMR (101 MHz,  $\text{CDCl}_3$ )  $\delta$  169.26, 141.05, 136.09, 130.85, 127.47, 126.38, 124.75, 77.45, 77.14, 76.82, 45.45, 23.36, 21.07, 19.24.

**N-(1-(m-tolyl)ethyl)acetamide(table 2-16)<sup>2</sup>**: white solid. Yield: 95.2%.  $^1\text{H}$  NMR (400 MHz,  $\text{CDCl}_3$ )  $\delta$  7.30 – 7.18 (m, 1H), 7.15 – 7.02 (m, 3H), 5.89 (s, 1H), 5.07 (p,  $J = 7.2$  Hz, 1H), 2.34 (s, 3H), 1.97 (s, 3H), 1.46 (d,  $J = 6.9$  Hz, 3H).  $^{13}\text{C}$  NMR (101 MHz,  $\text{CDCl}_3$ )  $\delta$  169.43, 143.16, 138.45, 128.71, 128.27, 127.15, 123.23, 77.48, 77.16, 76.84, 48.95, 23.52, 21.84, 21.56.

**N-(1-(4-chlorophenyl)ethyl)acetamide(table 2-17)<sup>2</sup>**: white solid. Yield: 61.3%. <sup>1</sup>H NMR (400 MHz, CDCl<sub>3</sub>) δ 7.29 (d, *J* = 8.5 Hz, 2H), 7.23 (d, *J* = 8.5 Hz, 2H), 5.86 (s, 1H), 5.07 (p, *J* = 7.2 Hz, 1H), 1.98 (s, 3H), 1.45 (d, *J* = 7.0 Hz, 3H). <sup>13</sup>C NMR (101 MHz, CDCl<sub>3</sub>) δ 169.49, 141.84, 133.18, 128.88, 127.70, 77.48, 77.16, 76.84, 48.36, 23.47, 21.80.

**N-benzhydrylacetamide(table 2-19)<sup>2</sup>**: white solid. Yield: 90.1%. <sup>1</sup>H NMR (400 MHz, CDCl<sub>3</sub>) δ 7.35 – 7.30 (m, 4H), 7.29 – 7.26 (m, 2H), 7.24 – 7.20 (m, 4H), 6.25 (d, *J* = 8.0 Hz, 1H), 6.18 (d, *J* = 8.3 Hz, 1H), 2.05 (s, 3H). <sup>13</sup>C NMR (101 MHz, CDCl<sub>3</sub>) δ 169.31, 141.62, 128.79, 127.60, 127.55, 77.48, 77.16, 76.84, 57.12, 23.45.

**N-((4-methoxyphenyl)(phenyl)methyl)acetamide(table 2-20)<sup>4</sup>**: white solid. Yield: 88.7%. <sup>1</sup>H NMR (400 MHz, CDCl<sub>3</sub>) δ 7.35 – 7.19 (m, 5H), 7.17 – 7.09 (m, 2H), 6.87 – 6.83 (m, 2H), 6.19 (d, *J* = 8.1 Hz, 1H), 6.12 (d, *J* = 8.2 Hz, 1H), 3.78 (s, 3H), 2.04 (s, 3H). <sup>13</sup>C NMR (101 MHz, CDCl<sub>3</sub>) δ 169.21, 159.03, 141.84, 133.88, 128.78, 128.73, 127.49, 127.40, 114.15, 77.48, 77.16, 76.84, 56.54, 55.42, 23.49.

**N-((4-chlorophenyl)(phenyl)methyl)acetamide(table 2-21)<sup>4</sup>**: white solid. Yield: 76.4%. <sup>1</sup>H NMR (400 MHz, CDCl<sub>3</sub>) δ 7.35 – 7.25 (m, 5H), 7.21 – 7.13 (m, 4H), 6.21 (q, *J* = 8.1 Hz, 2H), 2.03 (s, 3H). <sup>13</sup>C NMR (101 MHz, CDCl<sub>3</sub>) δ 169.40, 141.11, 140.13, 133.36, 128.94, 128.88, 128.83, 127.89, 127.59, 77.48, 77.16, 76.84, 56.60, 23.37.

**N-(bis(4-chlorophenyl)methyl)acetamide(table 2-22)<sup>4</sup>**: white solid. Yield: 51.0%. <sup>1</sup>H NMR (400 MHz, CDCl<sub>3</sub>) δ 7.27 (dd, *J* = 7.1, 3.7 Hz, 4H), 7.10 (dt, *J* = 7.7, 3.5 Hz, 4H), 6.26 – 6.04 (m, 2H), 2.02 (s, 3H). <sup>13</sup>C NMR (101 MHz, CDCl<sub>3</sub>) δ 169.49, 139.59, 133.75, 129.08, 128.89, 77.48, 77.16, 76.84, 56.04, 23.36.

**N-(phenyl(4-(trifluoromethyl)phenyl)methyl)acetamide(table 2-23)<sup>6</sup>**: white solid. Yield: 17.4%. <sup>1</sup>H NMR (400 MHz, CDCl<sub>3</sub>) δ 7.58 (d, *J* = 8.1 Hz, 2H), 7.39 – 7.25 (m, 5H), 7.22 – 7.17 (m, 2H), 6.27 (d, *J* = 7.6 Hz, 1H), 6.24 (d, *J* = 9.0 Hz, 1H), 2.06 (s, 3H). <sup>13</sup>C NMR (101 MHz, CDCl<sub>3</sub>) δ 169.60, 145.51, 140.72, 129.79 (q, *J* = 32.8 Hz), 129.10, 128.15, 127.73, 127.69, 125.73 (q, *J* = 3.7 Hz), 124.17 (d, *J* = 272.1 Hz), 77.48, 77.16, 76.84, 57.01, 23.36.

**N-(1-phenylethyl)acrylamide(table 3-1)<sup>9</sup>**: white solid. Yield: 91.0%. <sup>1</sup>H NMR (400 MHz, CDCl<sub>3</sub>) δ 7.39 – 7.21 (m, 5H), 6.28 (dd, *J* = 16.9, 1.6 Hz, 1H), 6.10 (dd, *J* = 17.0, 10.2 Hz, 1H), 5.62 (dd, *J* = 10.2, 1.5 Hz, 1H), 5.26 – 5.14 (m, 1H), 1.52 (d, *J* = 6.9 Hz, 3H). <sup>13</sup>C NMR (101 MHz, CDCl<sub>3</sub>) δ 164.73, 143.10, 130.98, 128.80, 127.53, 126.72, 126.36, 77.48, 77.16, 76.84, 48.92, 21.73.

**N-(1-phenylethyl)benzamide(table 3-2)<sup>2</sup>**: white solid. Yield: 96.0%. <sup>1</sup>H NMR (400 MHz, CDCl<sub>3</sub>) δ 7.82 – 7.74 (m, 2H), 7.52 – 7.33 (m, 7H), 7.31 – 7.25 (m, 1H), 6.40 (d, *J* = 7.8 Hz, 1H), 5.34 (p, *J* = 7.1 Hz, 1H), 1.61 (d, *J* = 6.9 Hz, 3H). <sup>13</sup>C NMR (101 MHz, CDCl<sub>3</sub>) δ 166.68, 143.21, 134.67, 131.57, 128.85, 128.66, 127.56, 127.02, 126.36, 77.45, 77.13, 76.81, 49.31, 21.81.

**picolinamide(table 3-3)<sup>12</sup>**: yellow solid. <sup>1</sup>H NMR (400 MHz, CDCl<sub>3</sub>) δ 8.57 (dt, *J* = 4.2, 2.1 Hz, 1H), 8.20 (dd, *J* = 7.9, 2.8 Hz, 1H), 7.97 – 7.79 (m, 1H), 7.48 – 7.40 (m, 1H), 6.17 (s, 1H). <sup>13</sup>C NMR (101 MHz, CDCl<sub>3</sub>) δ 167.08, 149.68, 148.43, 137.42, 126.58, 122.55, 77.48, 77.16, 76.84.

**2-chloro-N-(1-phenylethyl)acetamide(table 3-4)<sup>10</sup>**: white solid. Yield: 93.4%. <sup>1</sup>H NMR (400 MHz, CDCl<sub>3</sub>) δ 7.56 – 7.15 (m, 5H), 6.80 (s, 1H), 5.12 (pd, *J* = 7.2, 2.8 Hz, 1H), 4.09 – 3.95 (m, 3H), 1.52 (dd, *J* = 7.0, 3.0 Hz, 3H). <sup>13</sup>C NMR (101 MHz, CDCl<sub>3</sub>) δ 165.07, 142.43, 128.91, 127.75, 126.19, 77.48, 77.16, 76.84, 49.35, 42.74, 21.78.

**2-methoxy-N-(1-phenylethyl)acetamide(table 3-5)<sup>11</sup>**: white solid. Yield: 92.6%. <sup>1</sup>H NMR (400 MHz, CDCl<sub>3</sub>) δ 7.46 – 7.15 (m, 5H), 6.76 – 6.71 (m, 1H), 5.23 – 5.12 (m, 1H), 3.95 – 3.80 (m, 2H), 3.39 (s, 3H), 1.52 – 1.49 (m, 3H). <sup>13</sup>C NMR (101 MHz, CDCl<sub>3</sub>) δ 168.66, 143.08, 128.82, 127.53, 126.28, 77.48, 77.16, 76.84, 72.09, 59.24, 48.14, 22.00.

## Reference:

1. Nandy S, Das A K, Bhar S. Chemoselective formation of C–N bond in wet acetonitrile using amberlyst®-15 (H) as a recyclable catalyst[J]. *Synthetic Communications*, 2020, 50(21): 3326-3336.
2. Zhang L, Chen B, He P, et al. Polyoxometalate–Ionic Liquid-Catalyzed Ritter Reaction for Efficient Synthesis of Amides[J]. *Synlett*, 2022, 33(15): 1515-1518.
3. Mohar B, Stephan M. Practical Enantioselective Hydrogenation of  $\alpha$ -Aryl- and  $\alpha$ -Carboxyamidoethylenes by Rhodium (I)-{1, 2-Bis [(*o*-tert-butoxyphenyl)(phenyl) phosphino] ethane}[J]. *Advanced Synthesis & Catalysis*, 2013, 355(2-3): 594-600.
4. Li N, Wang L, Zhang L, et al. Air-stable Bis (pentamethylcyclopentadienyl) Zirconium Perfluorooctanesulfonate as an Efficient and Recyclable Catalyst for the Synthesis of N-substituted Amides[J]. *ChemCatChem*, 2018, 10(16): 3532-3538.
5. Fernandes R A, Bethi V. An expedient osmium (VI)/K<sub>3</sub>Fe(CN)<sub>6</sub>-mediated selective oxidation of benzylic, allylic and propargylic alcohols[J]. *RSC advances*, 2014, 4(76): 40561-40568.
6. Awano T, Ohmura T, Suginome M. Inversion or retention? Effects of acidic additives on the stereochemical course in enantiospecific Suzuki–Miyaura coupling of  $\alpha$ -(acetylamino) benzylboronic esters[J]. *Journal of the American Chemical Society*, 2011, 133(51): 20738-20741.
7. Xu Y, Li Q, Ye R, et al. Electrochemical Oxidative C–H Amination through a Ritter-Type Reaction[J]. *The Journal of Organic Chemistry*, 2023, 88(13): 9518-9522.
8. Fumagalli G, Boyd S, Greaney M F. Oxyarylation and aminoarylation of styrenes using photoredox catalysis[J]. *Organic letters*, 2013, 15(17): 4398-4401.
9. Malandain A, Molins M, Hauwelle A, et al. Carbon dioxide radical anion by photoinduced equilibration between formate salts and [<sup>11</sup>C, <sup>13</sup>C, <sup>14</sup>C] CO<sub>2</sub>: application to carbon isotope radiolabeling[J]. *JACS*, 2023, 145(30): 16760-16770.
10. Goodrich P, Gunaratne H Q N, Hall L, et al. Using chiral ionic liquid additives to enhance asymmetric induction in a Diels–Alder reaction[J]. *Dalton Transactions*, 2017, 46(5): 1704-1713.
11. Deiana L, Rafi A A, Naidu V R, et al. Artificial plant cell walls as multi-catalyst systems for enzymatic cooperative asymmetric catalysis in non-aqueous media[J]. *Chemical Communications*, 2021, 57(70): 8814-8817.

12.Sharma K N, Ali M, Srivastava A K, et al. ( $\eta^6$ -Benzene) Ru (II) half-sandwich complexes of pyrazolated chalcogenoethers for catalytic activation of aldehydes to amides transformation[J]. Journal of Organometallic Chemistry, 2019, 879: 69-77.



### III. NMR spectra of the products

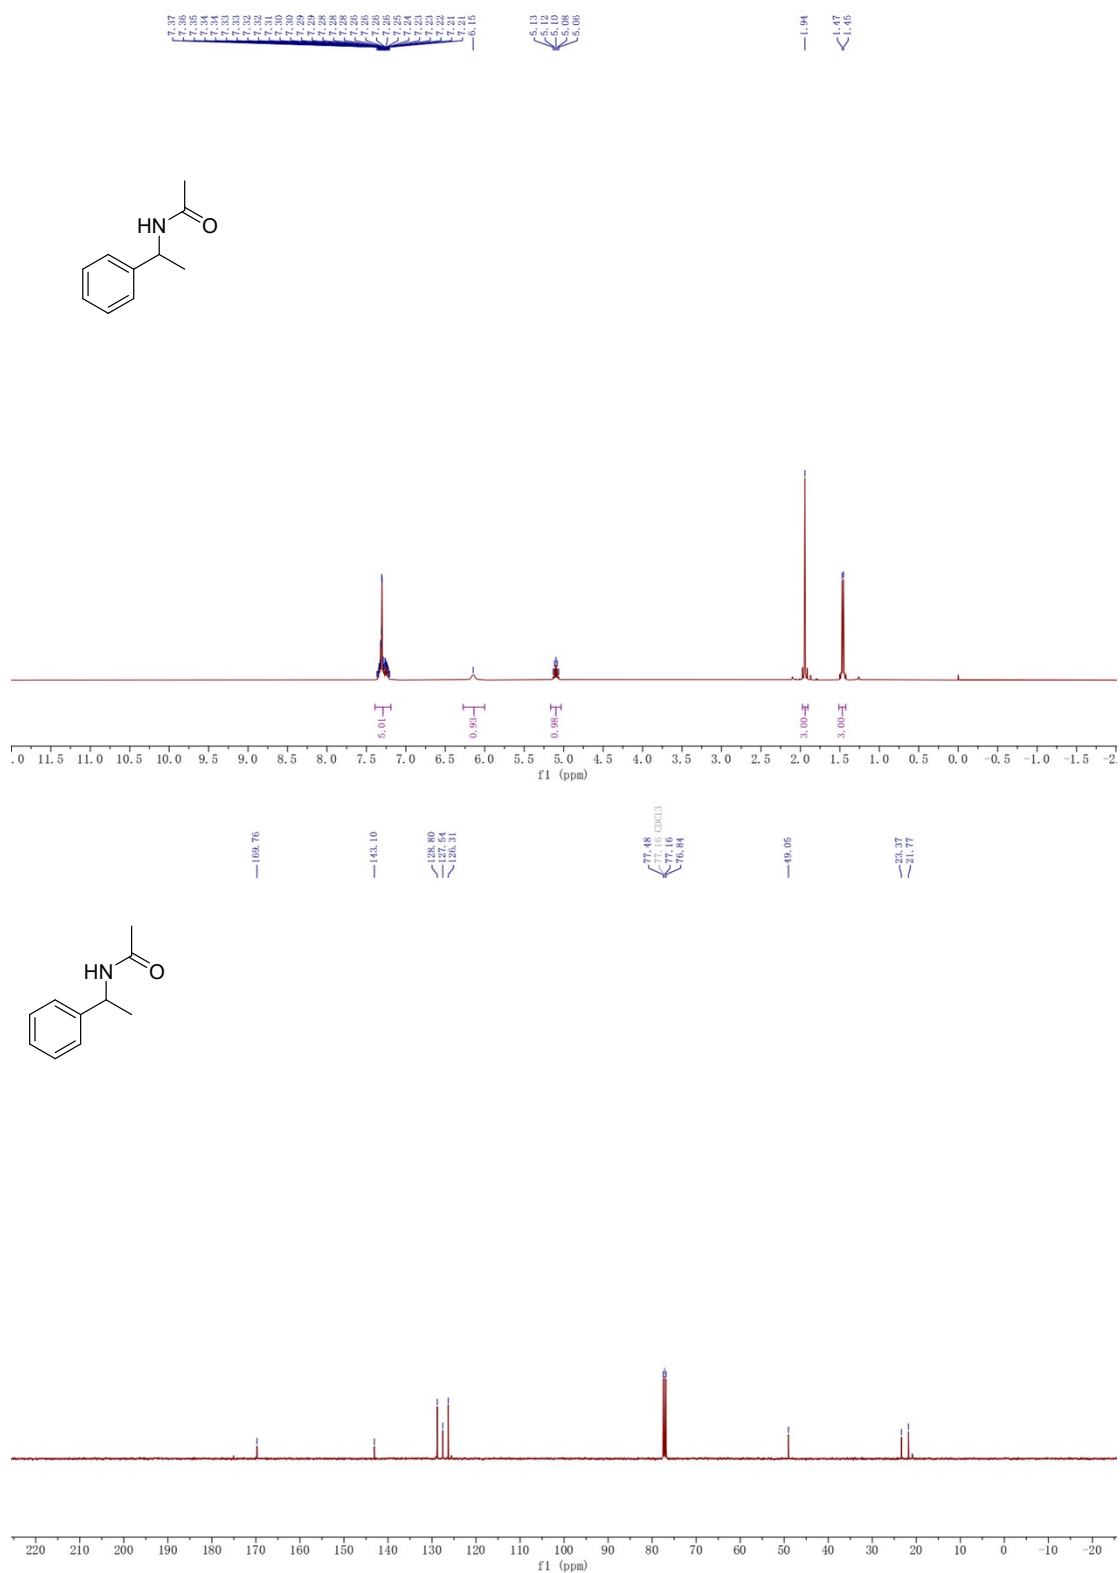

Figure S1.  $^1\text{H}$  (top) and  $^{13}\text{C}$  (bottom) NMR spectra of N-(1-phenylethyl) acetamide (table 2-1).

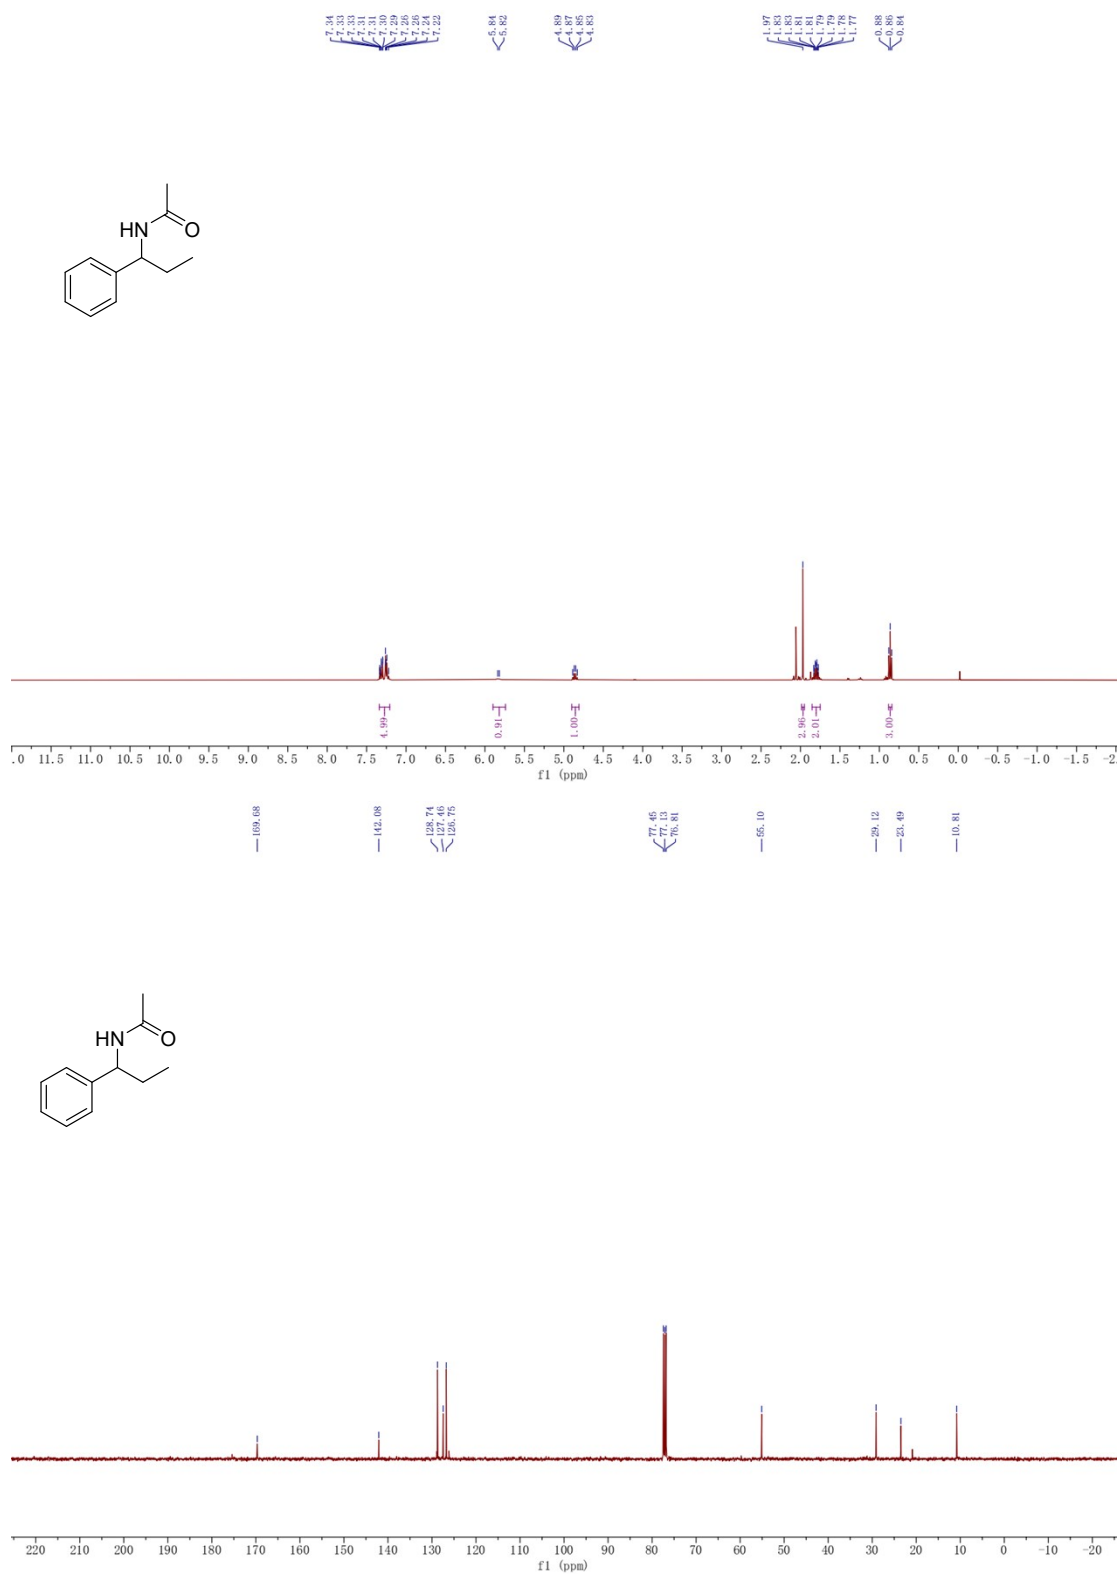

**Figure S2. <sup>1</sup>H (top) and <sup>13</sup>C (bottom) NMR spectra of N-(1-phenylpropyl) acetamide (table 2-2).**

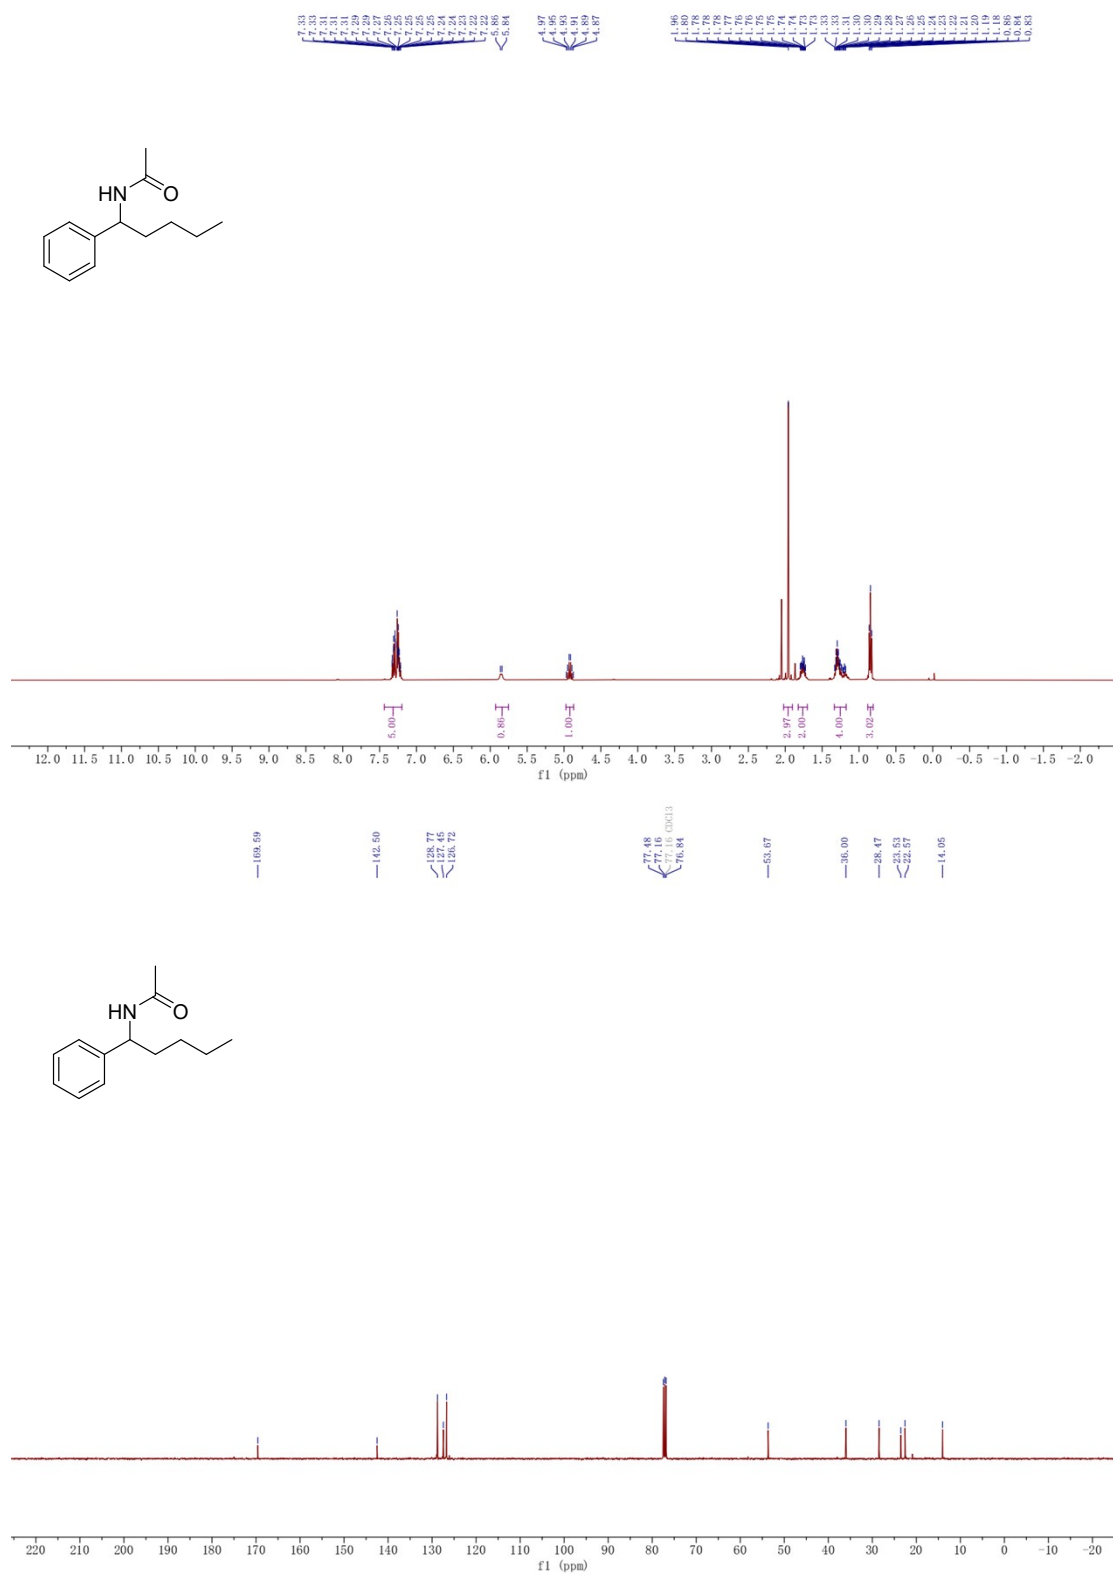

Figure S3. <sup>1</sup>H (top) and <sup>13</sup>C (bottom) NMR spectra of N-(1-phenylpentyl) acetamide (table 2-3).

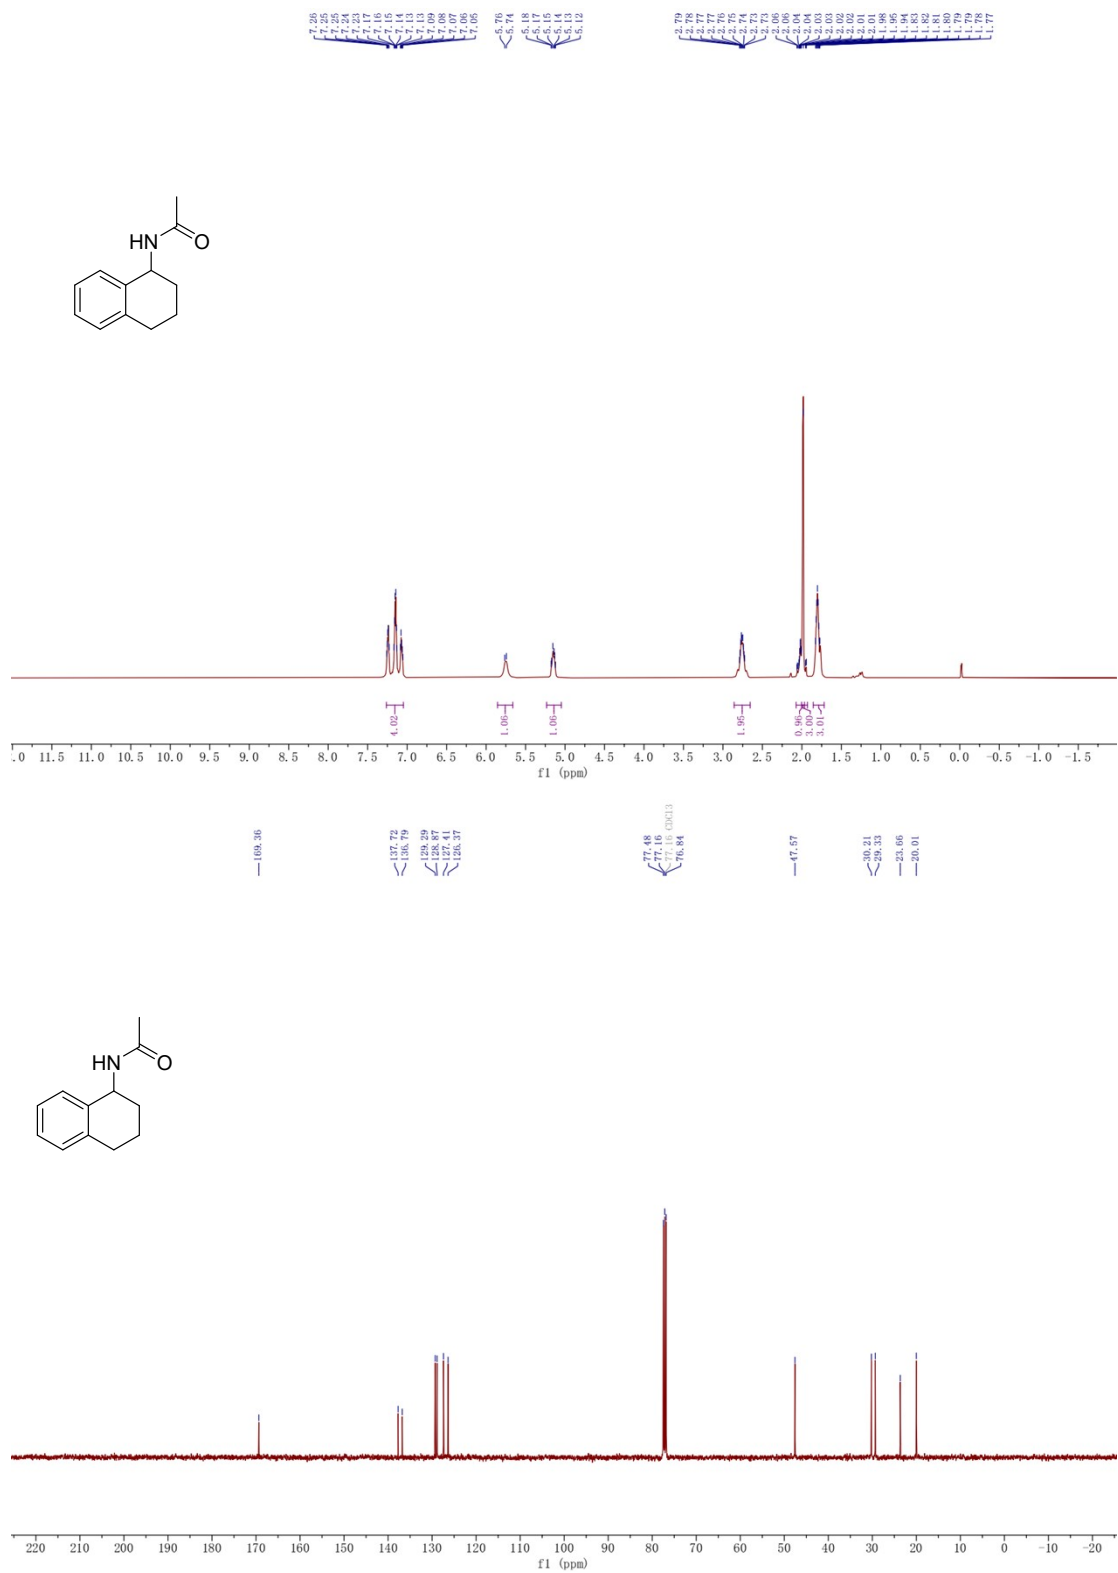

**Figure S4. <sup>1</sup>H (top) and <sup>13</sup>C (bottom) NMR spectra of N-(1,2,3,4-tetrahydronaphthalen-1-yl)acetamide (table 2-4).**

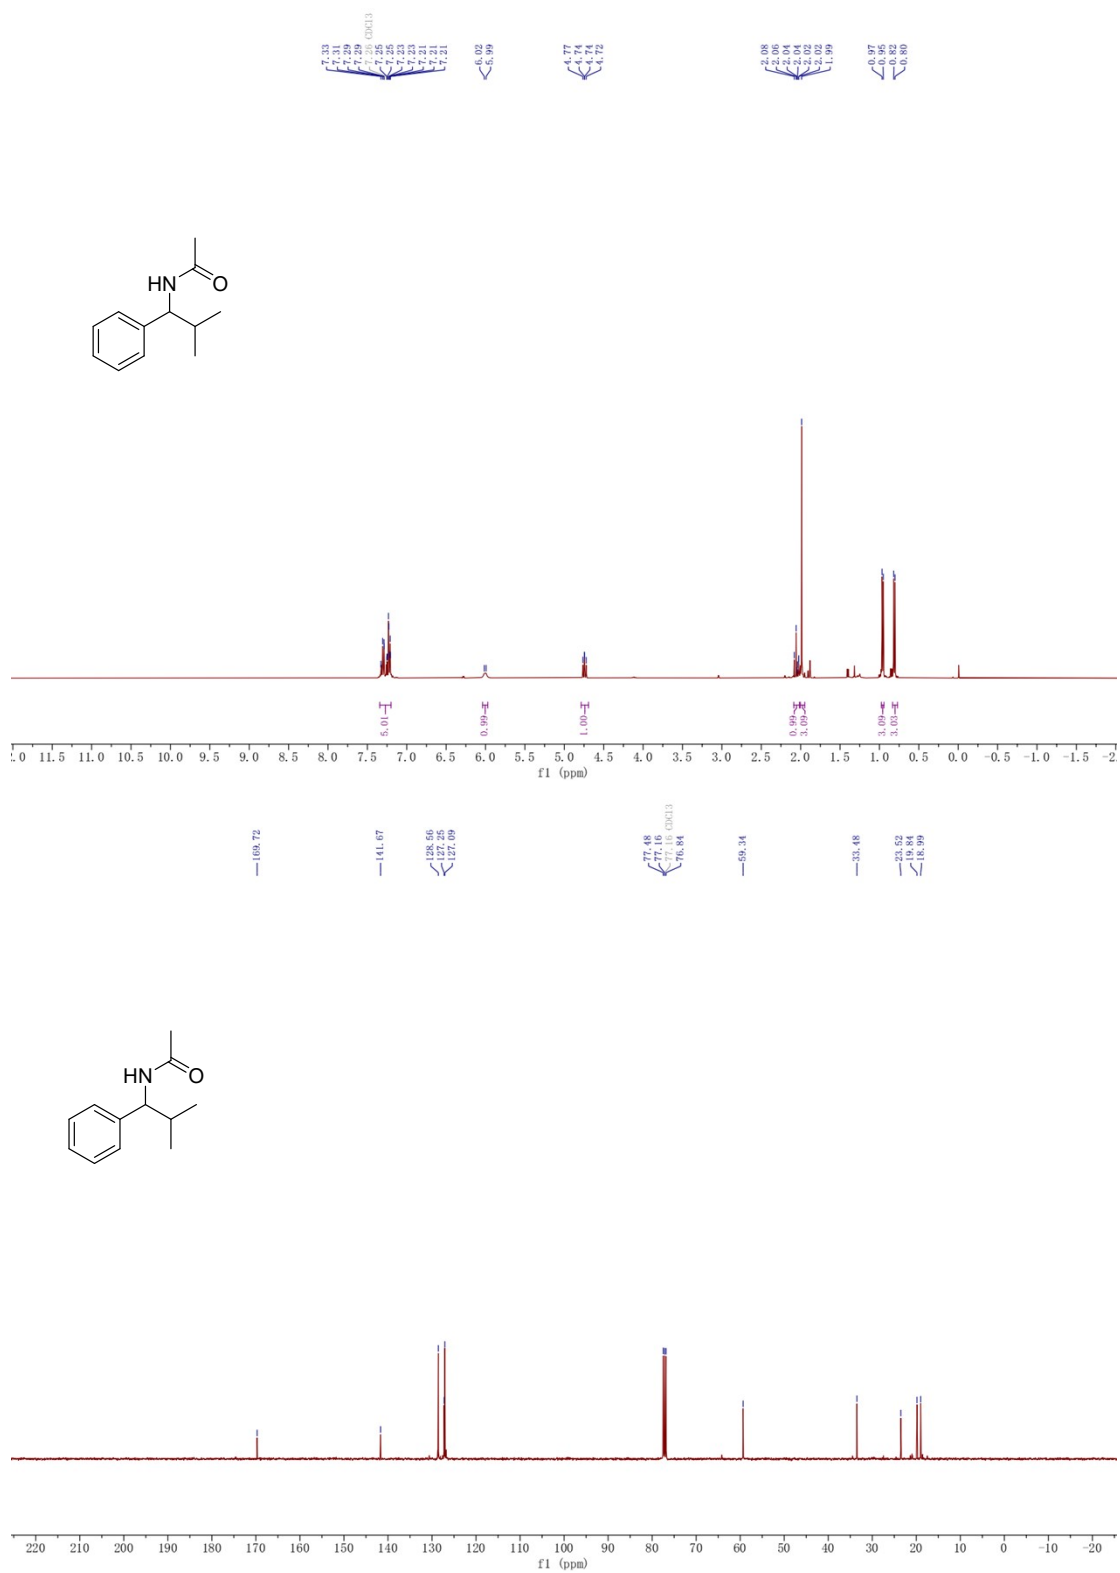

**Figure S5. <sup>1</sup>H (top) and <sup>13</sup>C (bottom) NMR spectra of N-(2-methyl-1-phenylpropyl)acetamide (table 2-5).**

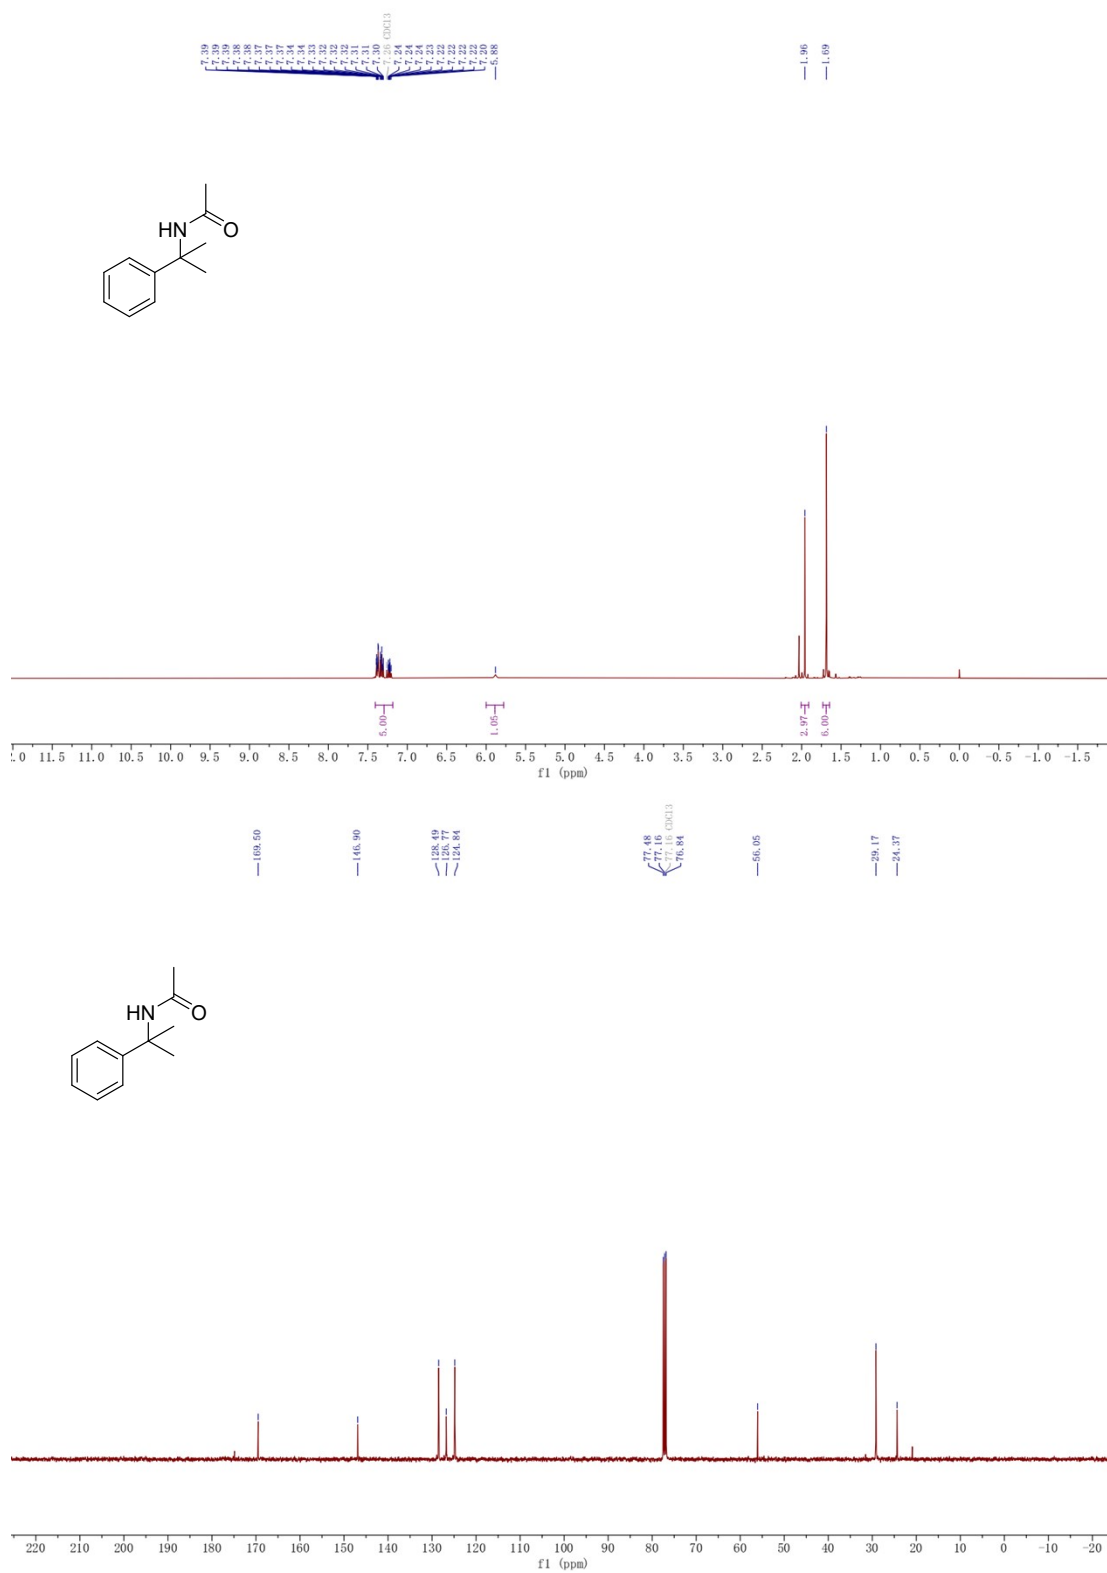

**Figure S6.**  $^1\text{H}$  (top) and  $^{13}\text{C}$  (bottom) NMR spectra of N-(2-phenylpropan-2-yl) acetamide (table 2-6).

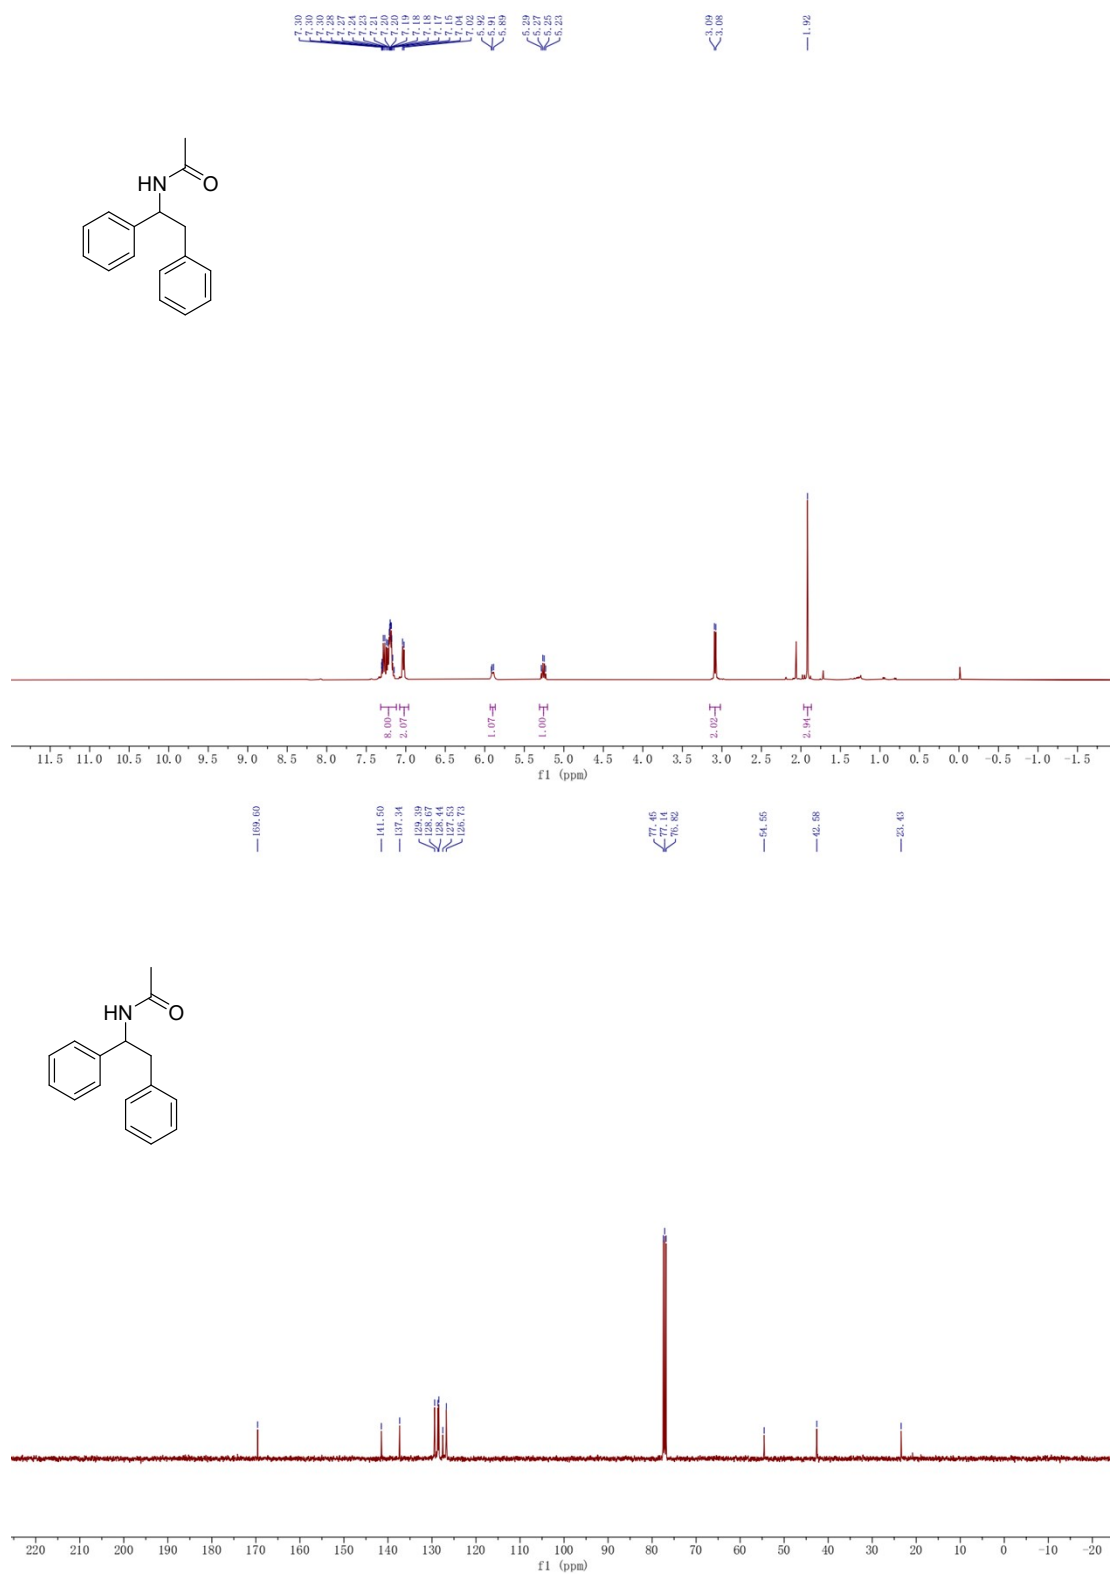

**Figure S7. <sup>1</sup>H (top) and <sup>13</sup>C (bottom) NMR spectra of N-(1,2-diphenylethyl) acetamide (table 2-7).**

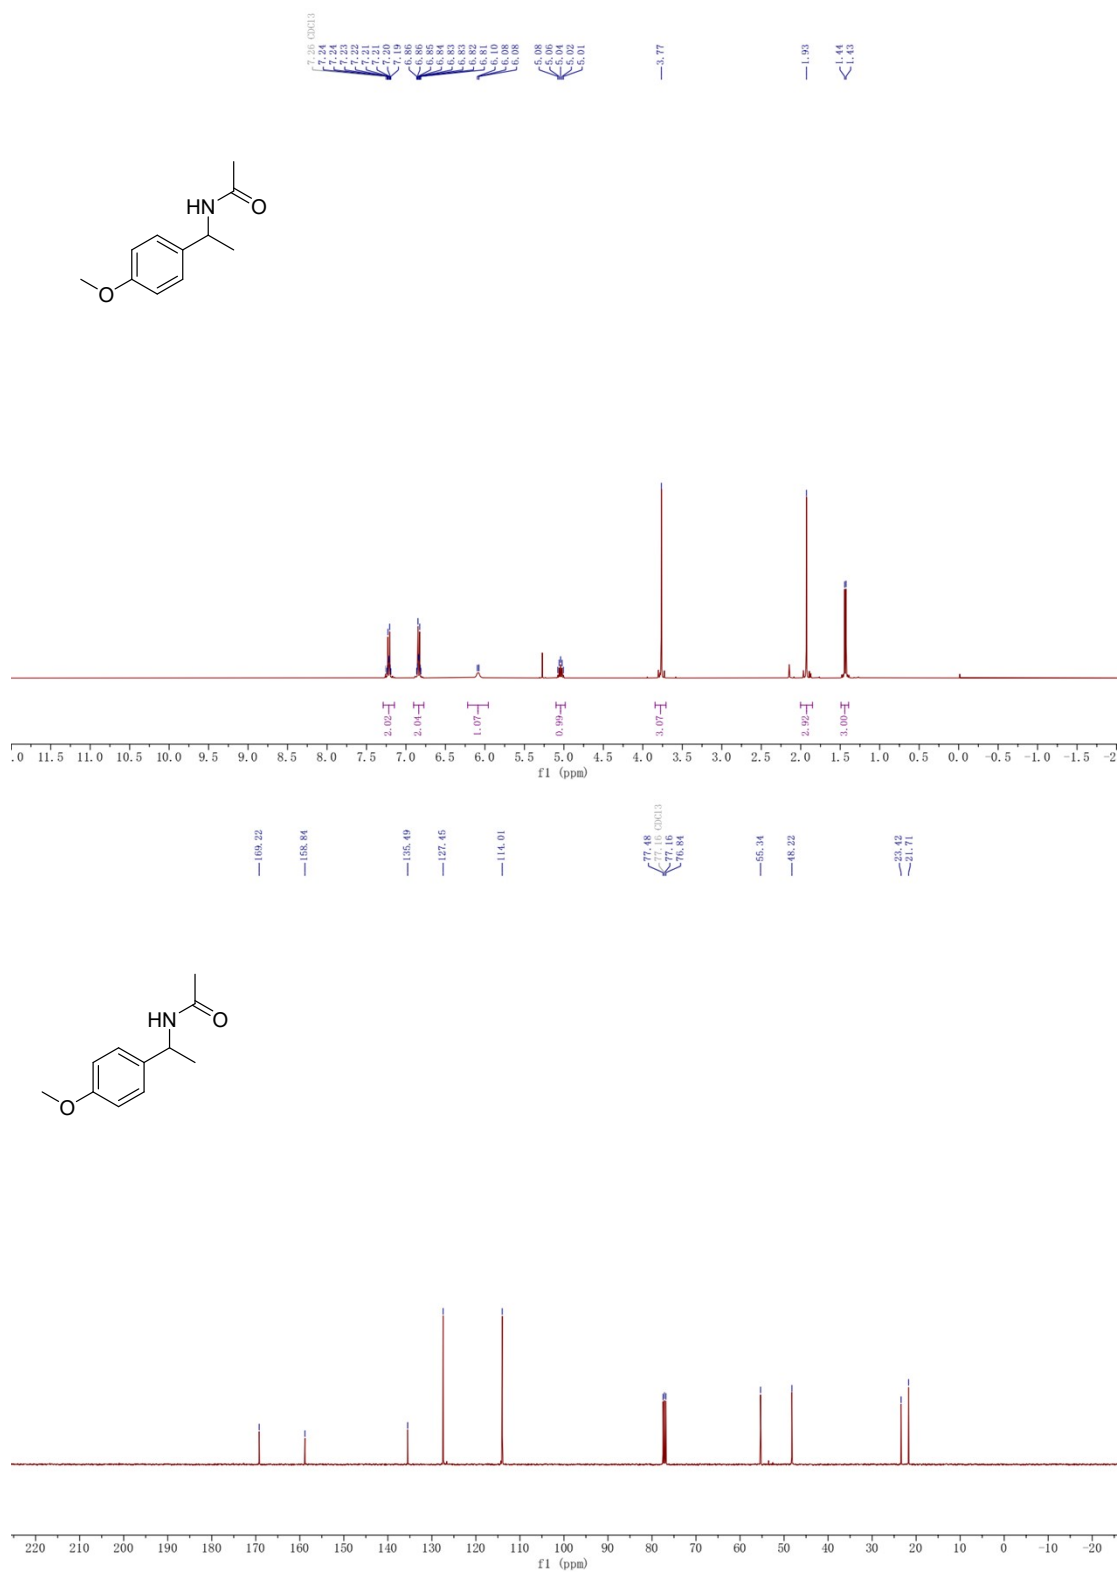

**Figure S8.** <sup>1</sup>H (top) and <sup>13</sup>C (bottom) NMR spectra of N-(1-(4-methoxyphenyl)ethyl)acetamide (table 2-8).



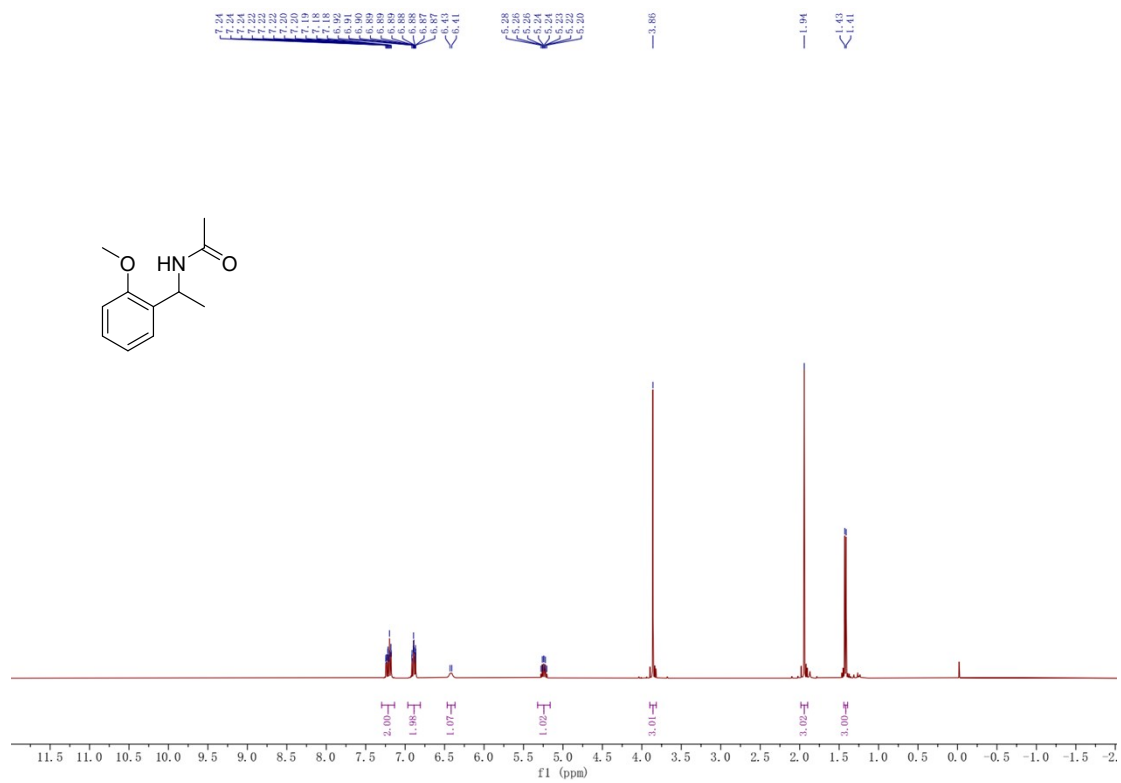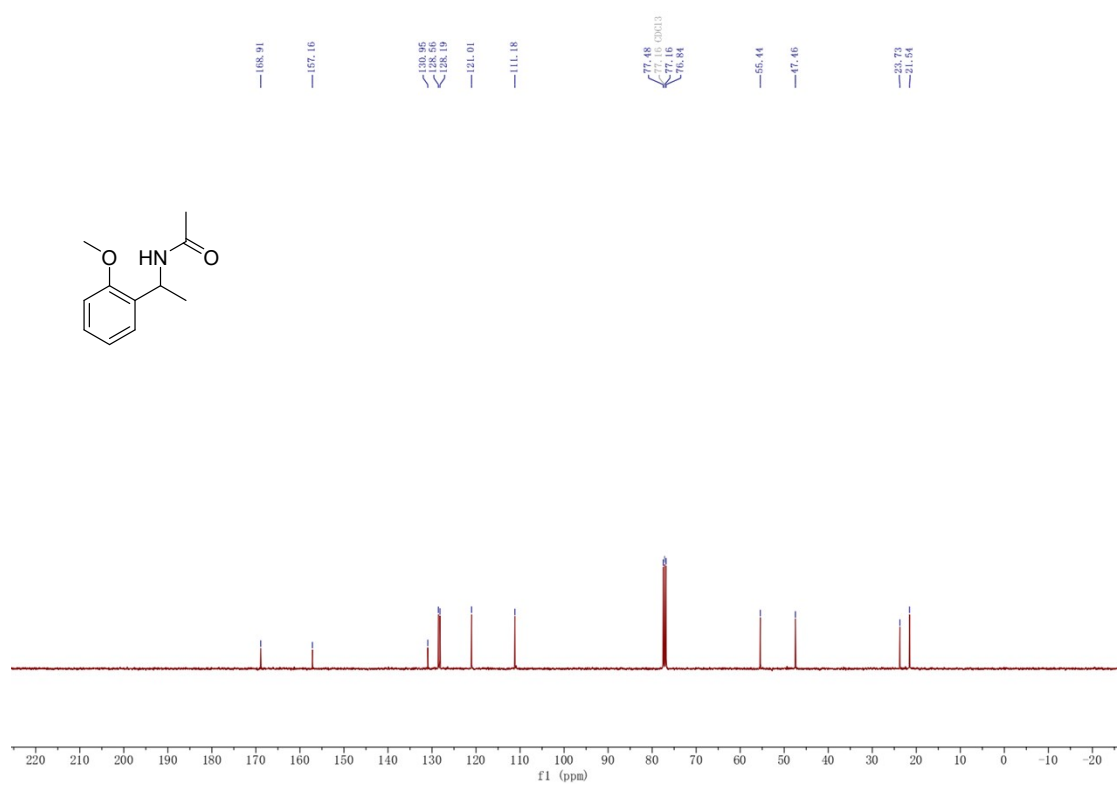

**Figure S9.** <sup>1</sup>H (top) and <sup>13</sup>C (bottom) NMR spectra of N-(1-(2-methoxyphenyl)ethyl)acetamide (table 2-9).

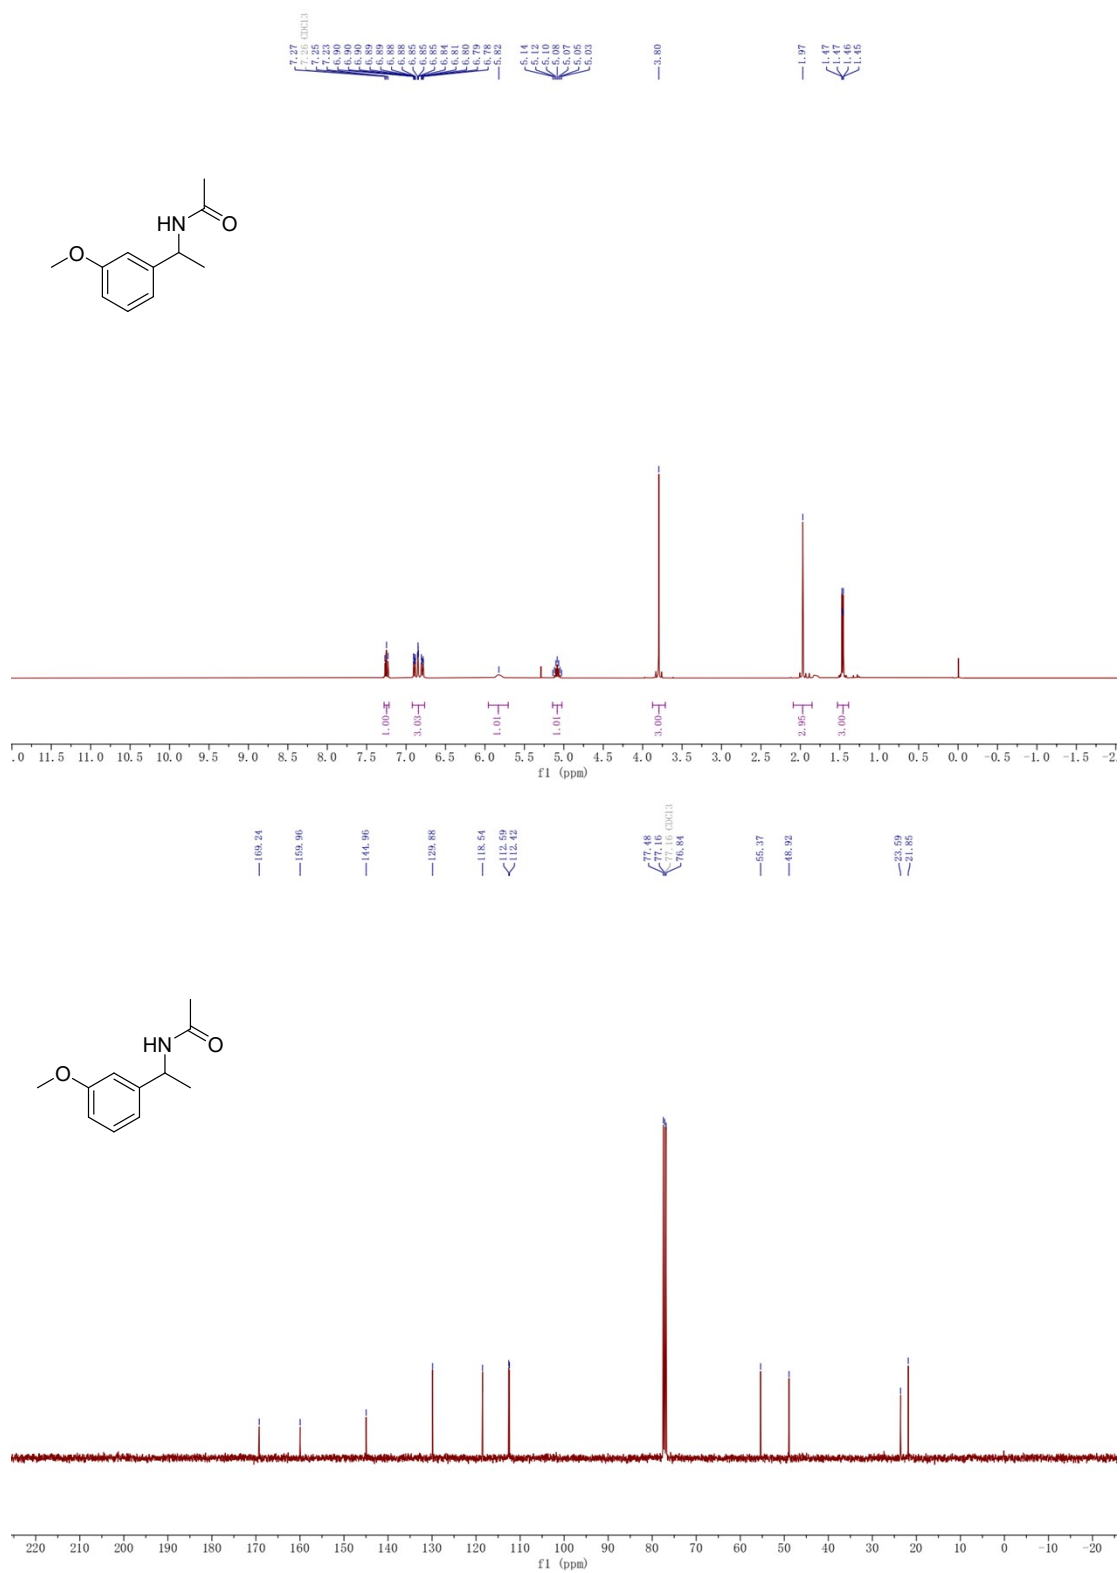

**Figure S10.** <sup>1</sup>H (top) and <sup>13</sup>C (bottom) NMR spectra of N-(1-(3-methoxyphenyl)ethyl)acetamide (table 2-10).

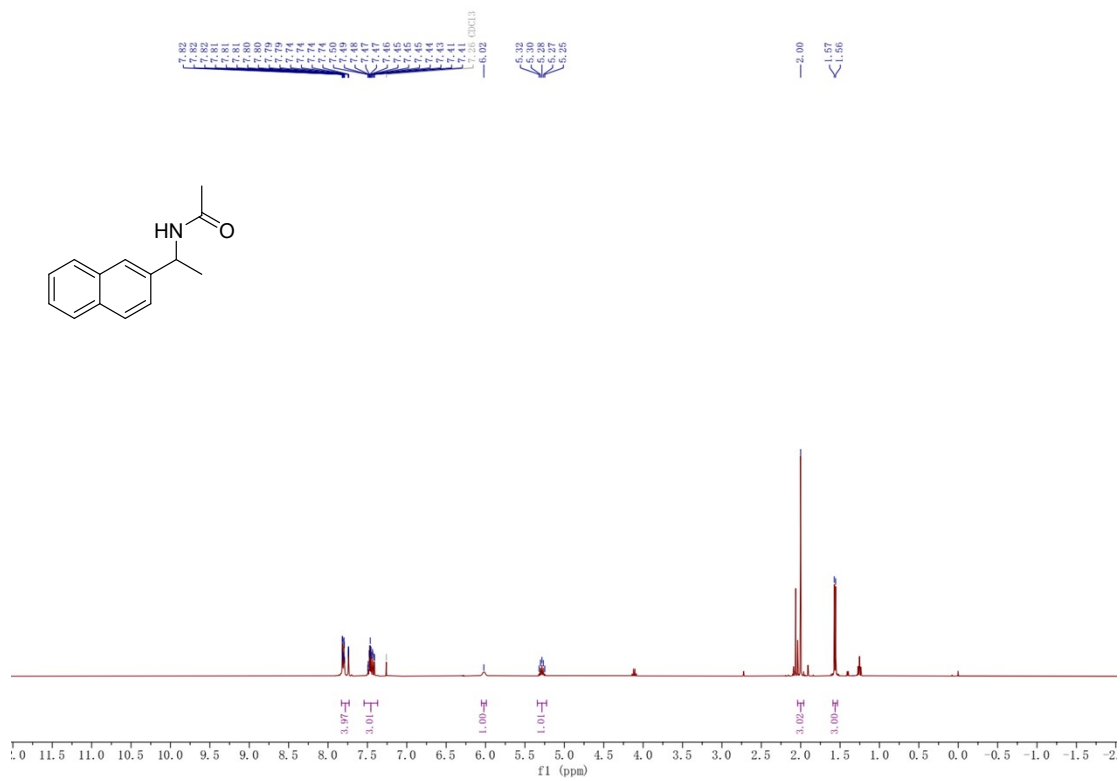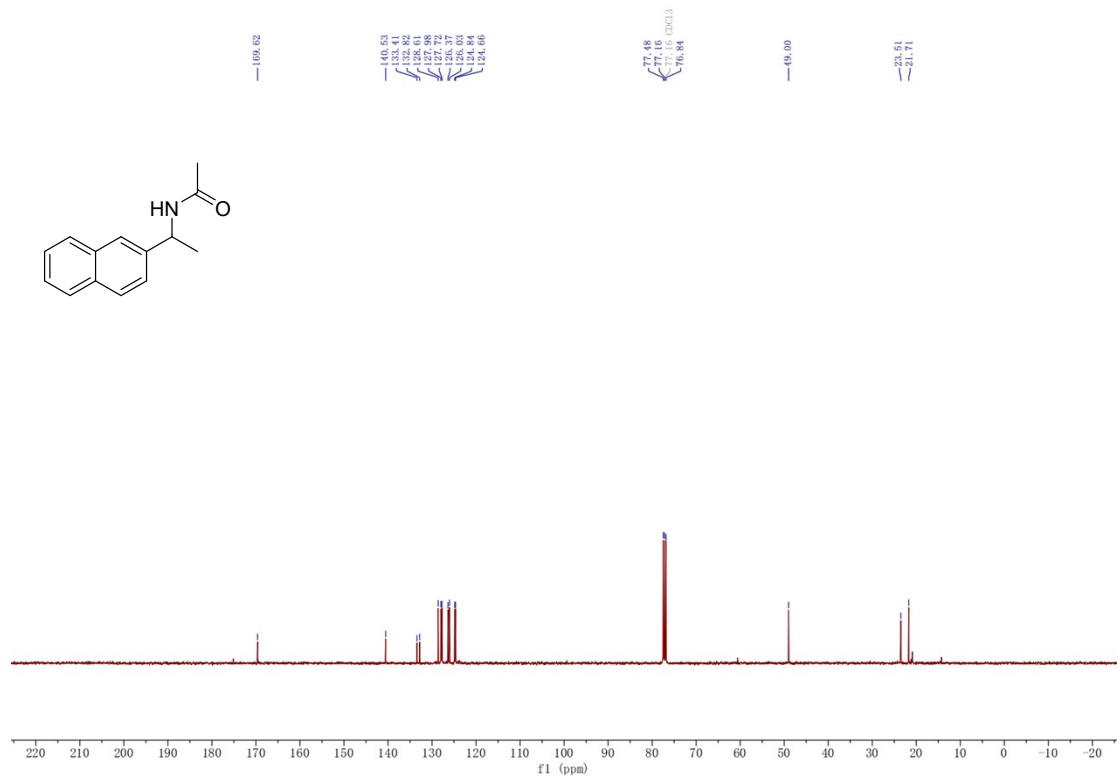

**Figure S11.** <sup>1</sup>H (top) and <sup>13</sup>C (bottom) NMR spectra of N-(1-(naphthalen-2-yl)ethyl)acetamide (table 2-11).

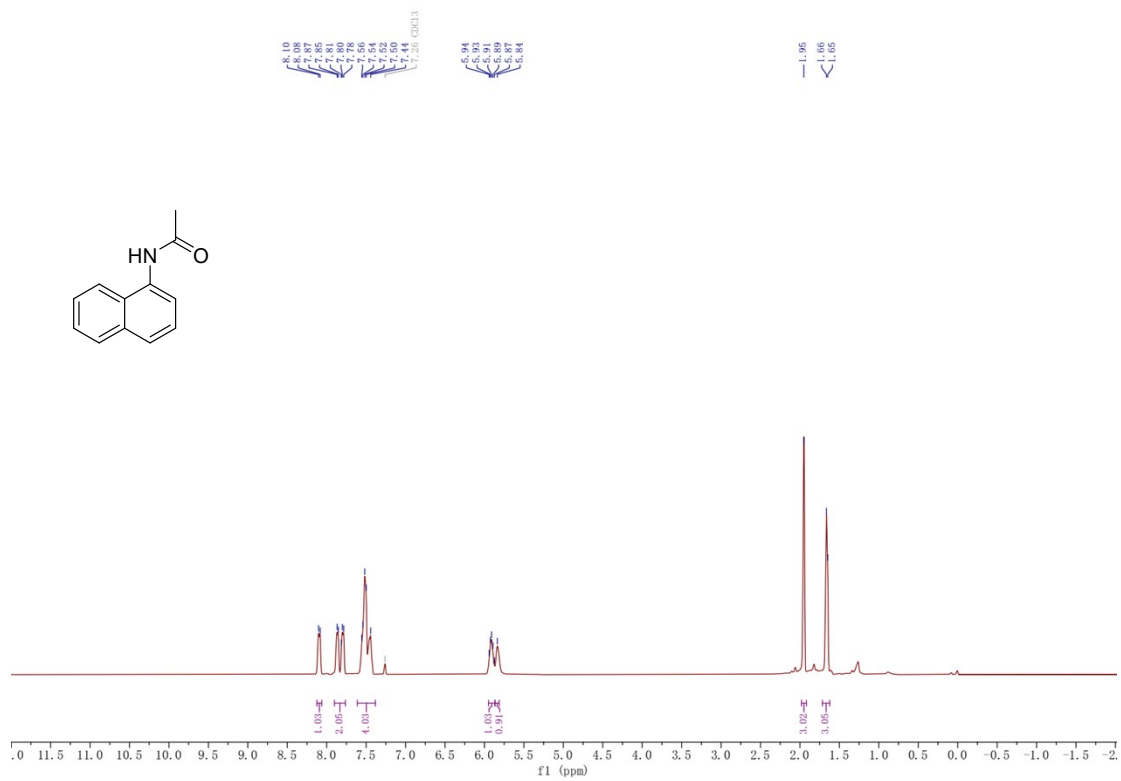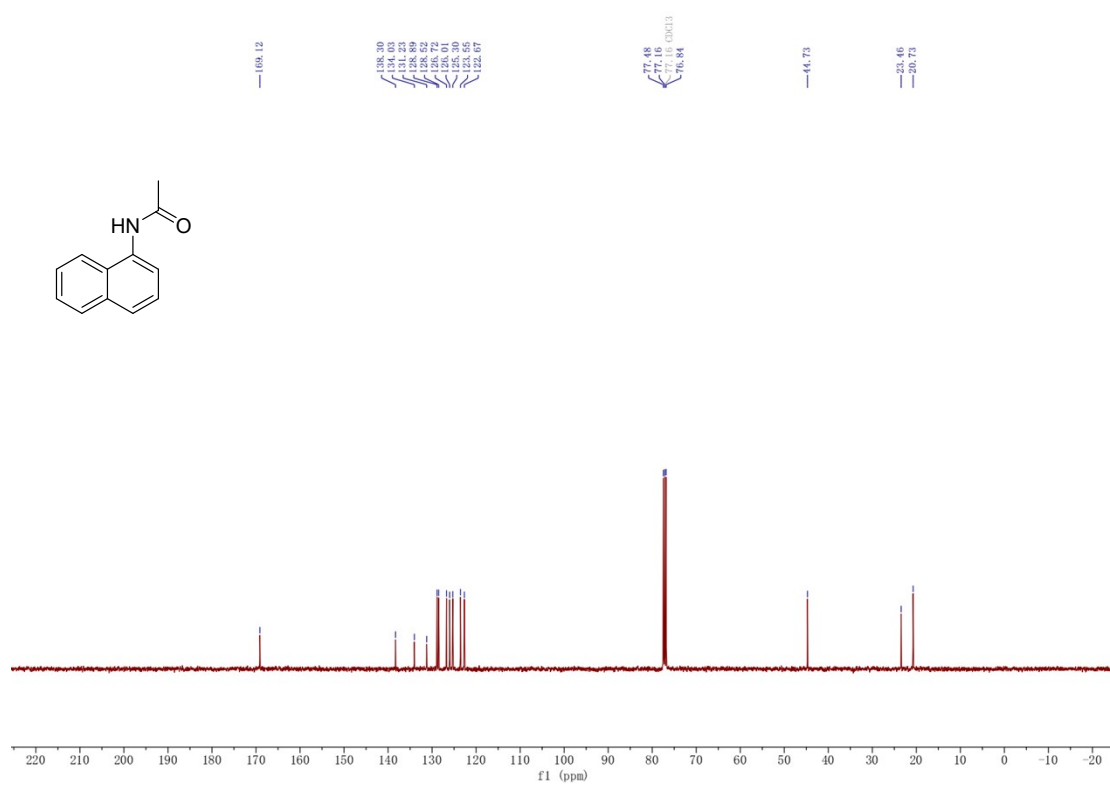

**Figure S12.** <sup>1</sup>H (top) and <sup>13</sup>C (bottom) NMR spectra of N-(1-(naphthalen-1-yl)ethyl) acetamide (table 2-12).

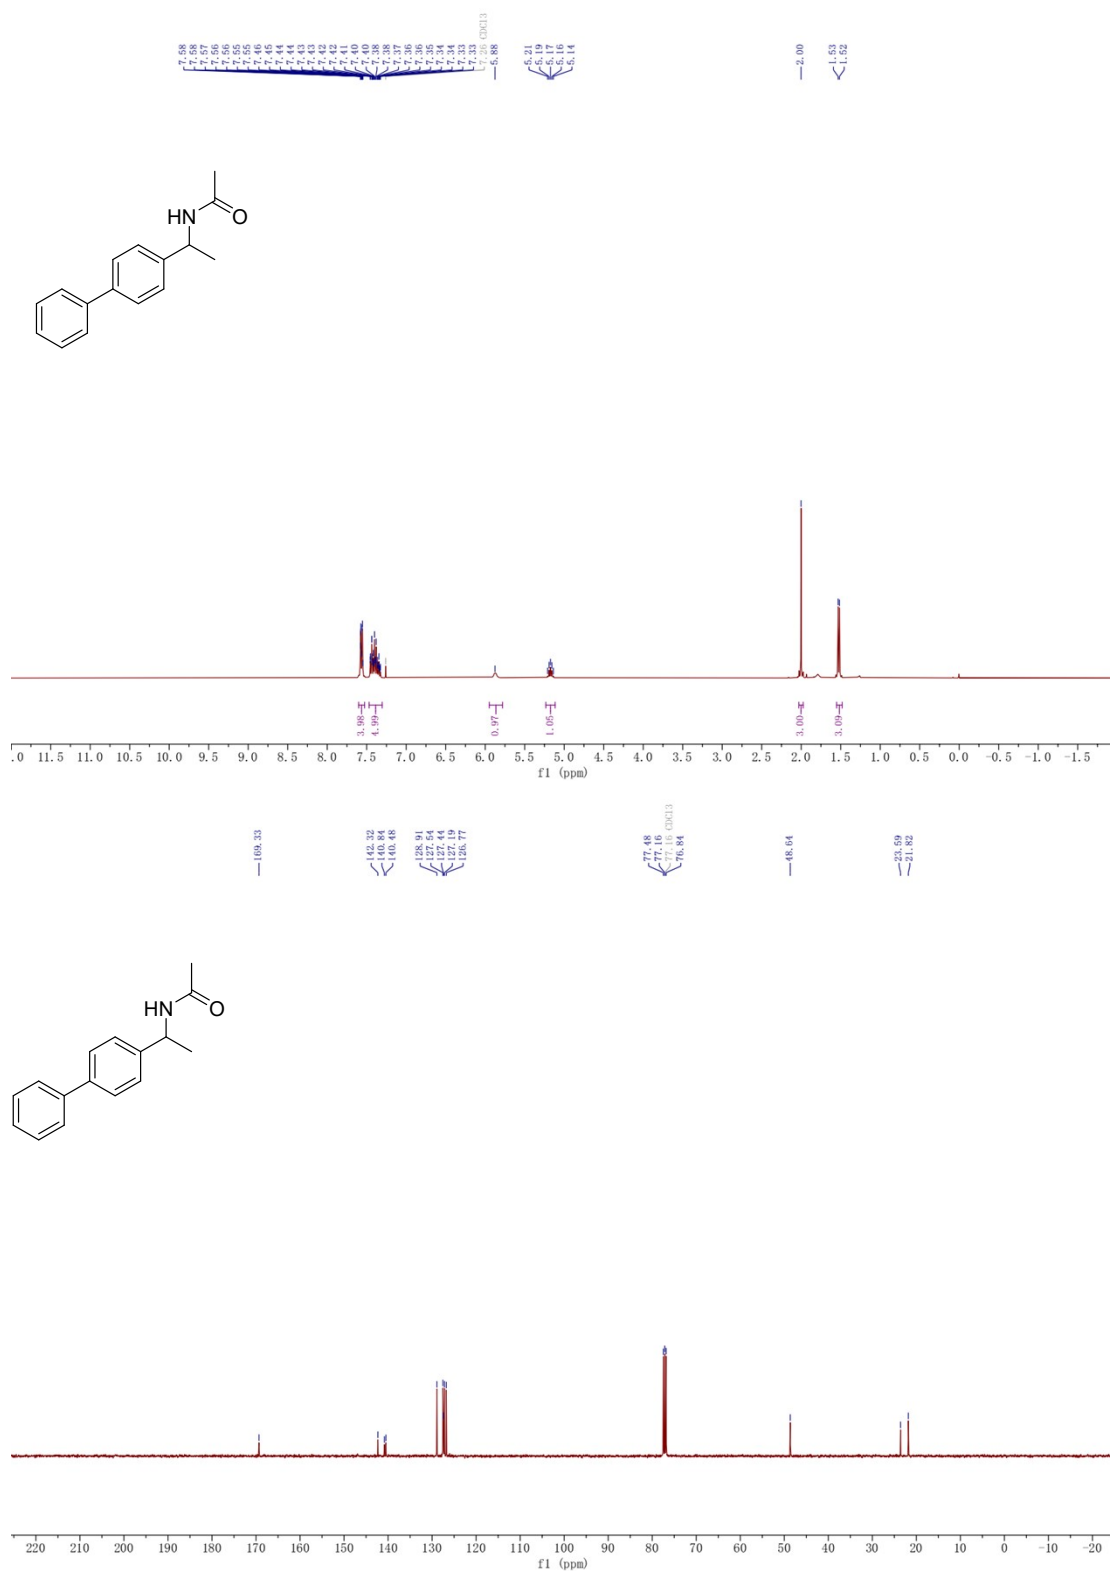

Figure S13. <sup>1</sup>H (top) and <sup>13</sup>C (bottom) NMR spectra of N-(1-([1,1'-biphenyl]-4-yl)ethyl)acetamide (table 2-13).

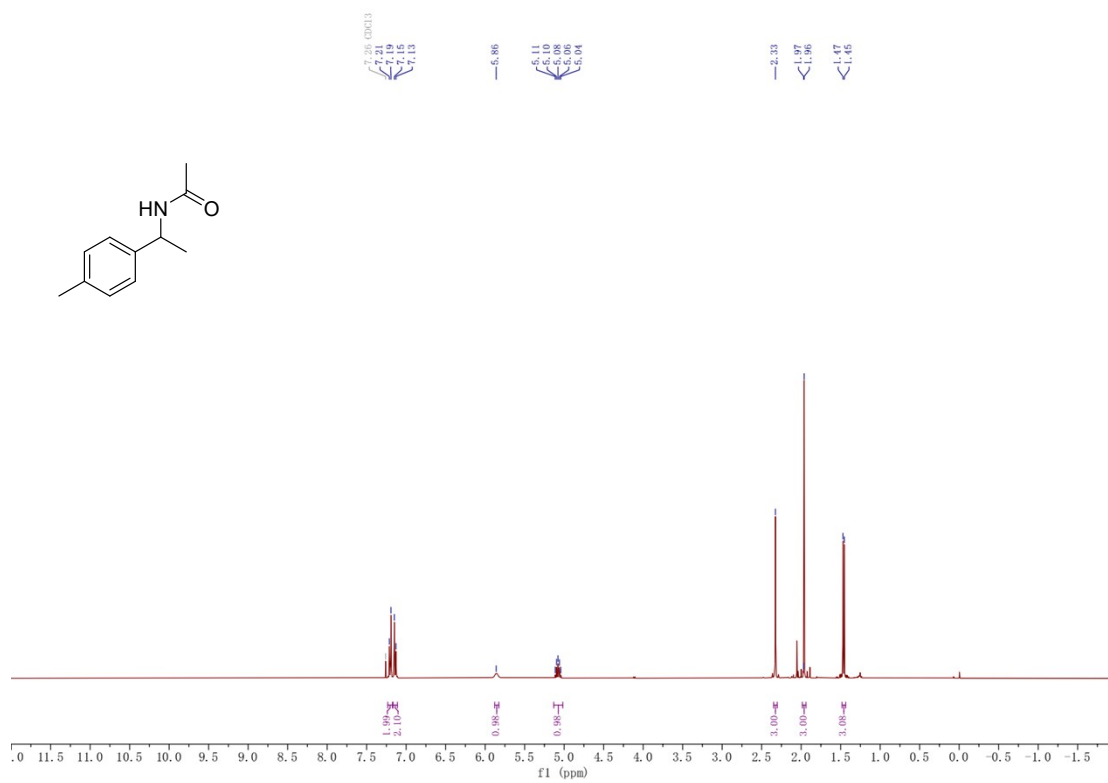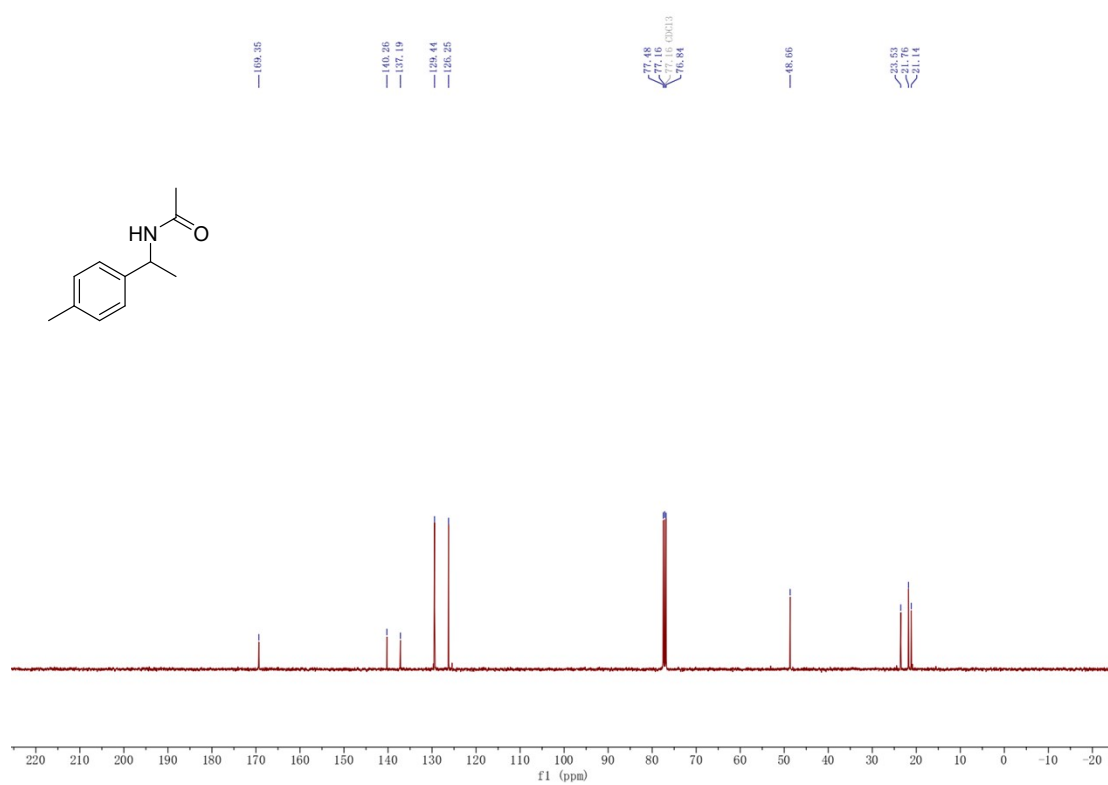

**Figure S14.** <sup>1</sup>H (top) and <sup>13</sup>C (bottom) NMR spectra of N-(1-(p-tolyl)ethyl) acetamide (table 2-14).

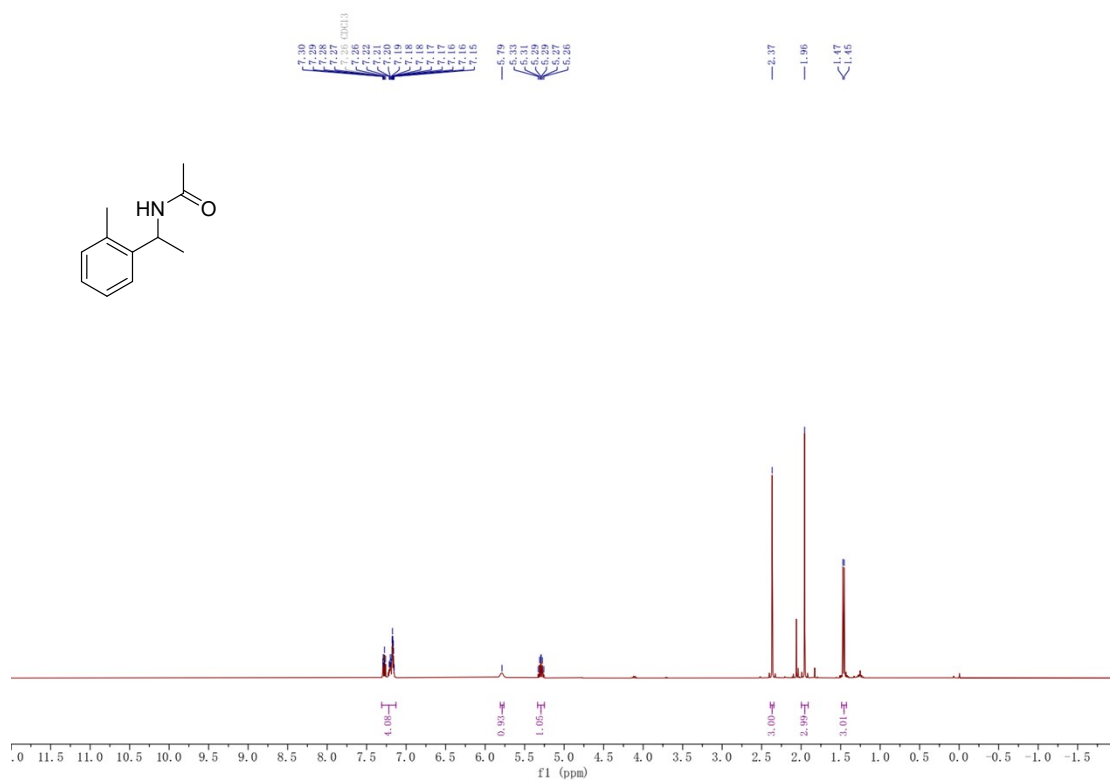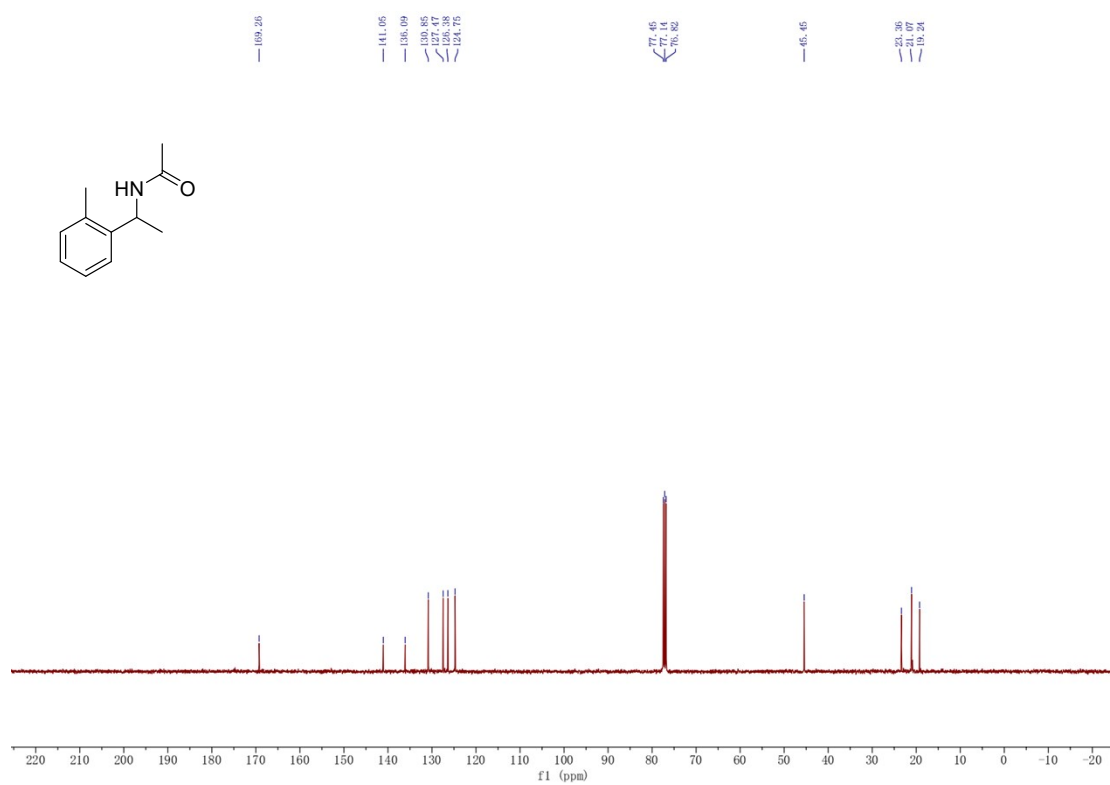

**Figure S15.** <sup>1</sup>H (top) and <sup>13</sup>C (bottom) NMR spectra of N-(1-(o-tolyl)ethyl) acetamide (table 2-15).

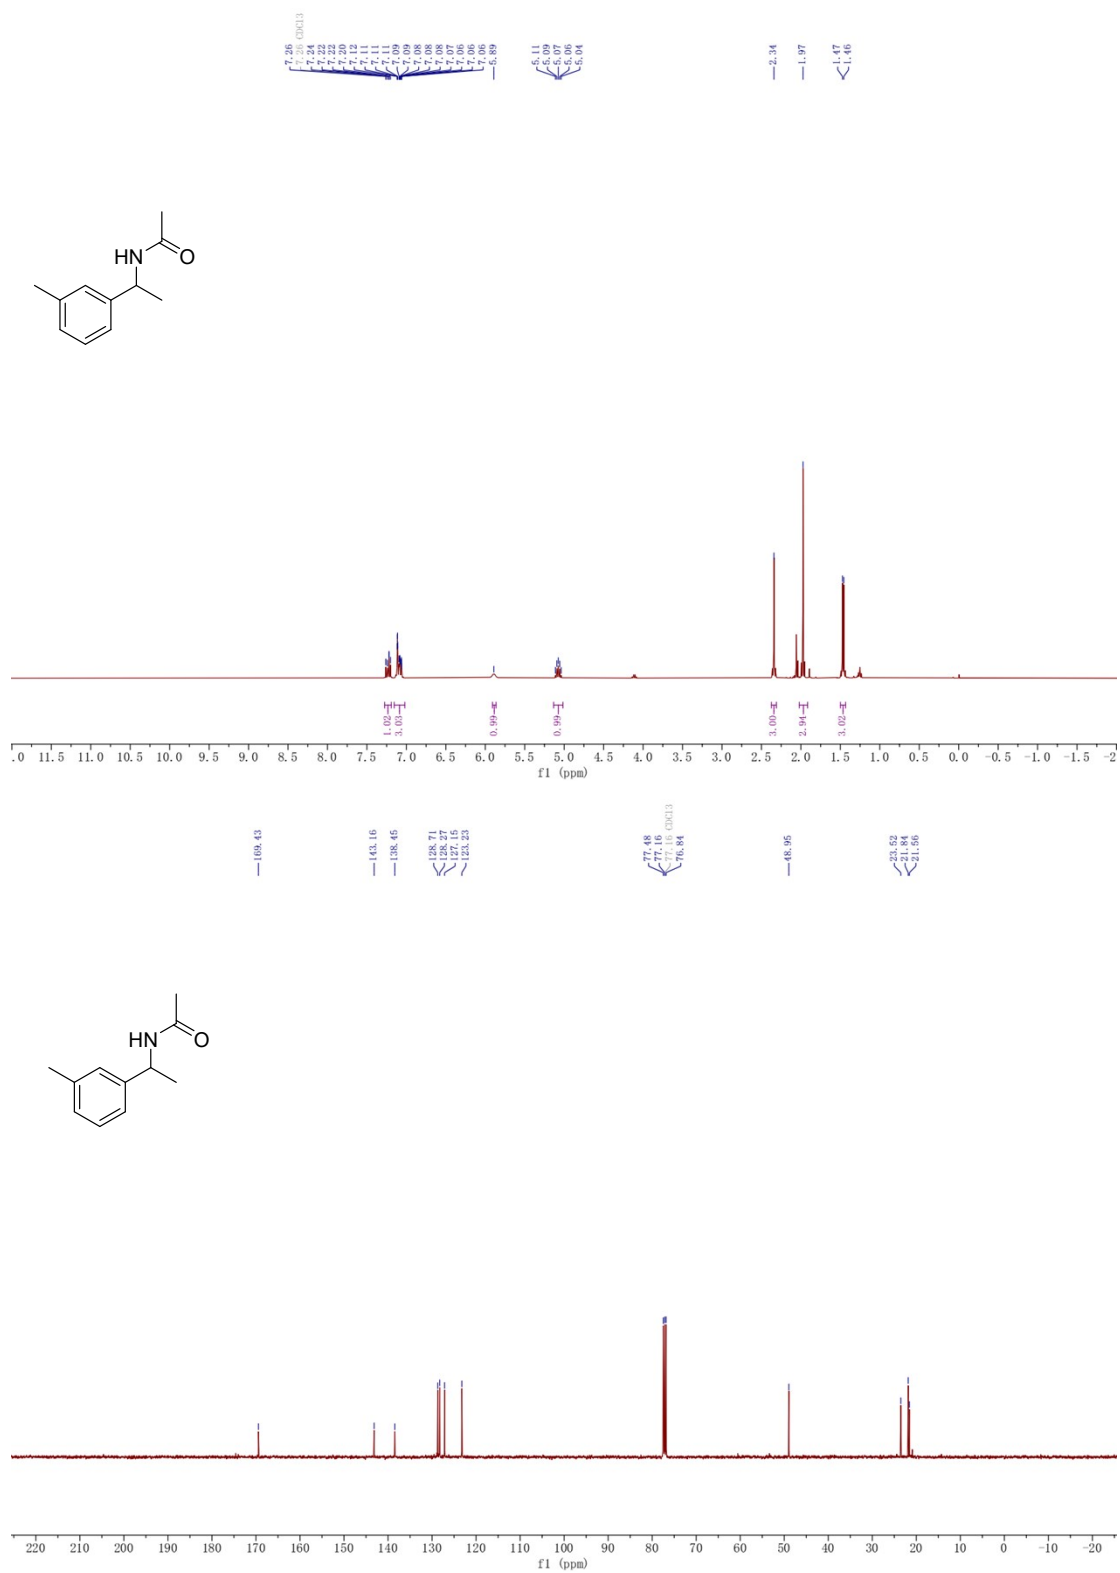

**Figure S16.** <sup>1</sup>H (top) and <sup>13</sup>C (bottom) NMR spectra of N-(1-(m-tolyl)ethyl) acetamide (table 2-16).



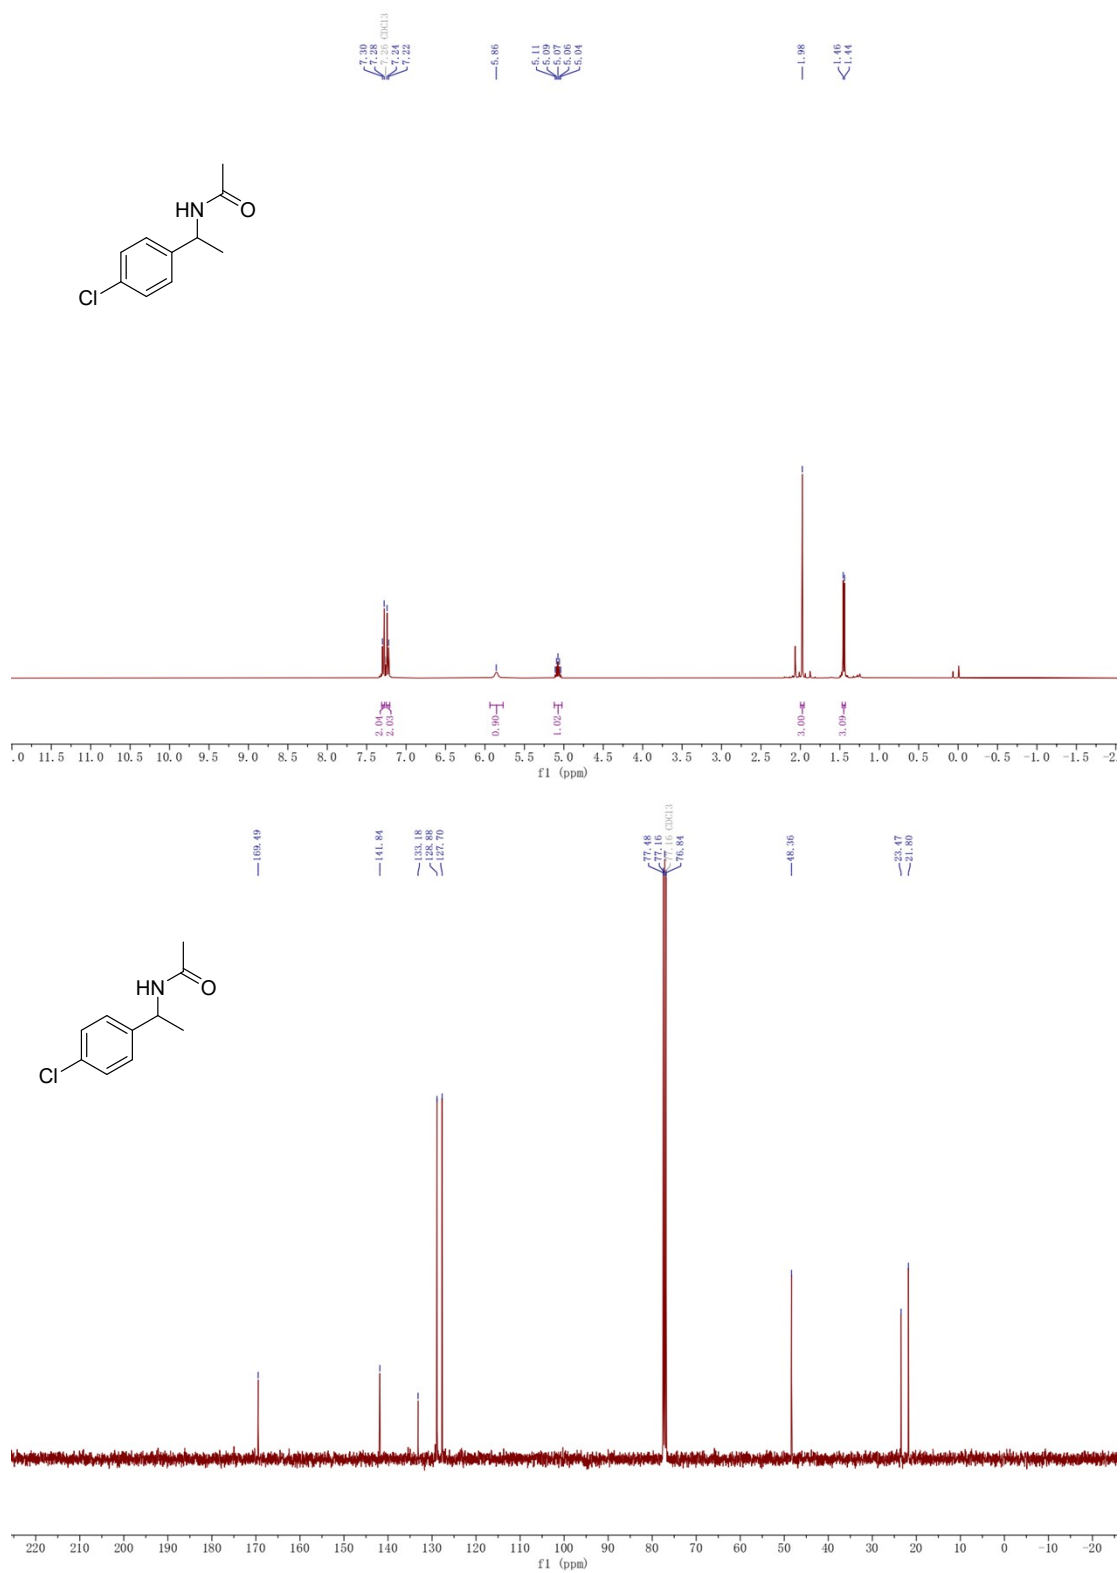

**Figure S17. <sup>1</sup>H (top) and <sup>13</sup>C (bottom) NMR spectra of N-(1-(4-chlorophenyl)ethyl)acetamide (table 2-17).**

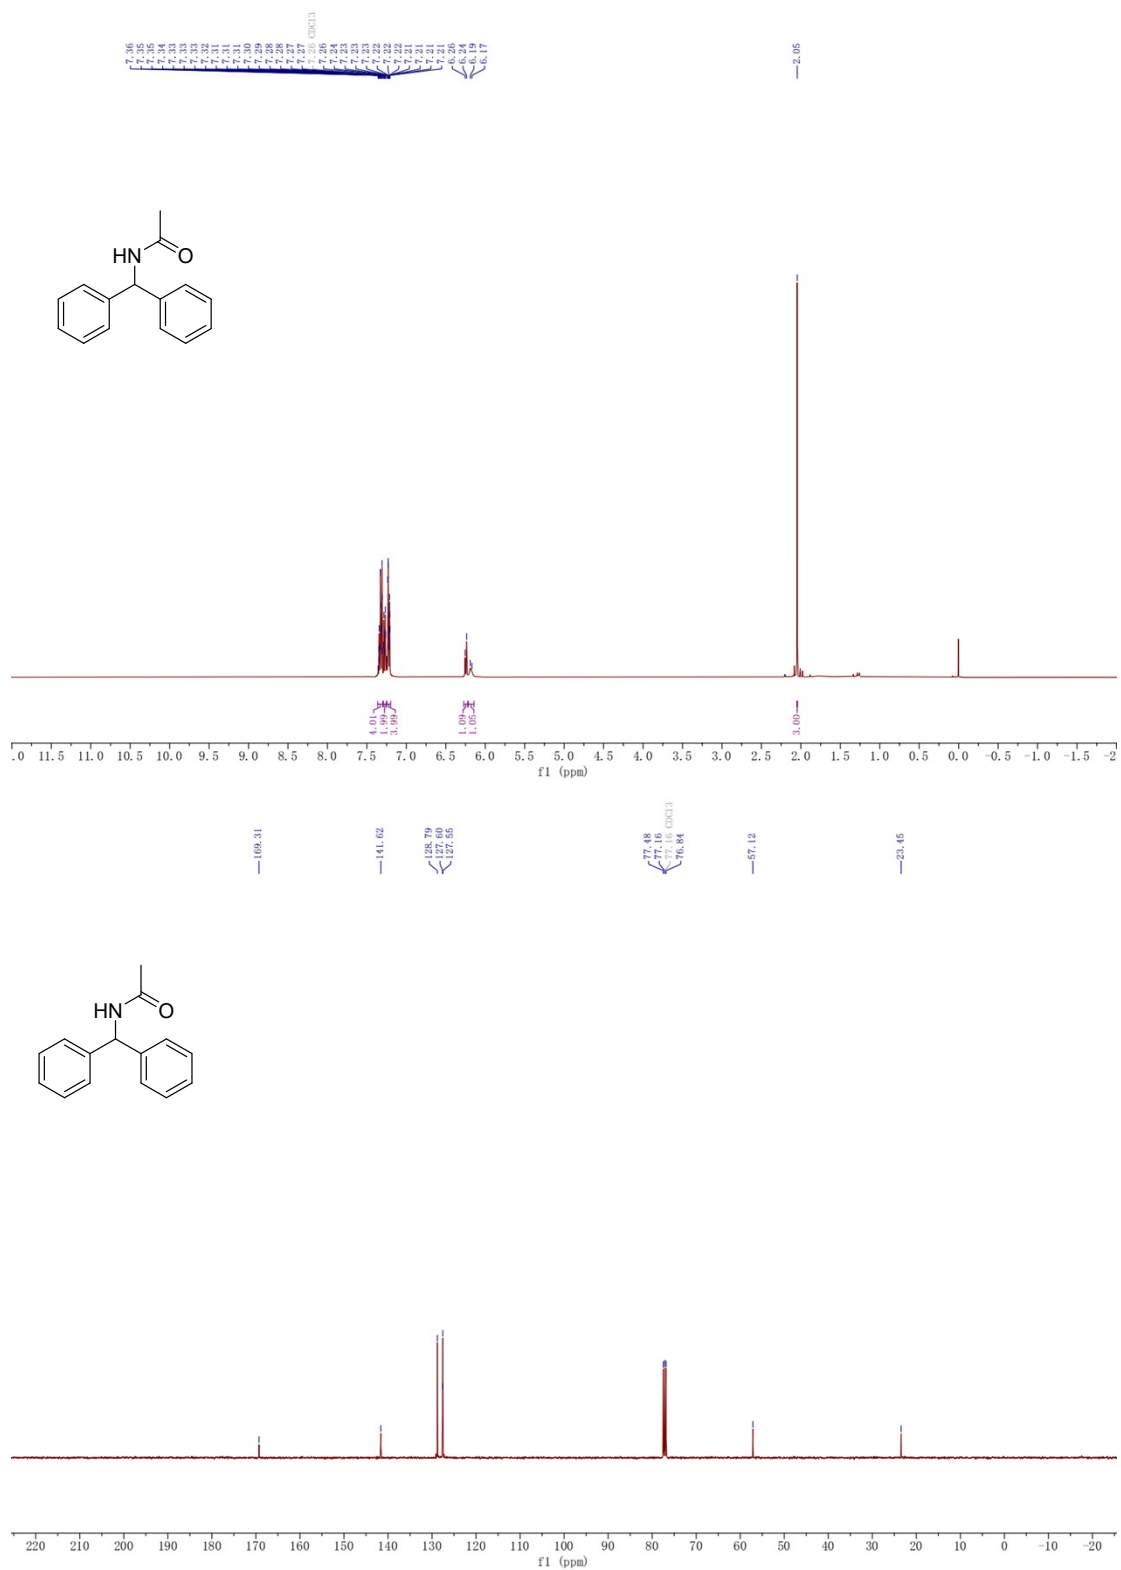

**Figure S18.** <sup>1</sup>H (top) and <sup>13</sup>C (bottom) NMR spectra of N-benzhydrylacetylamine (table 2-19).

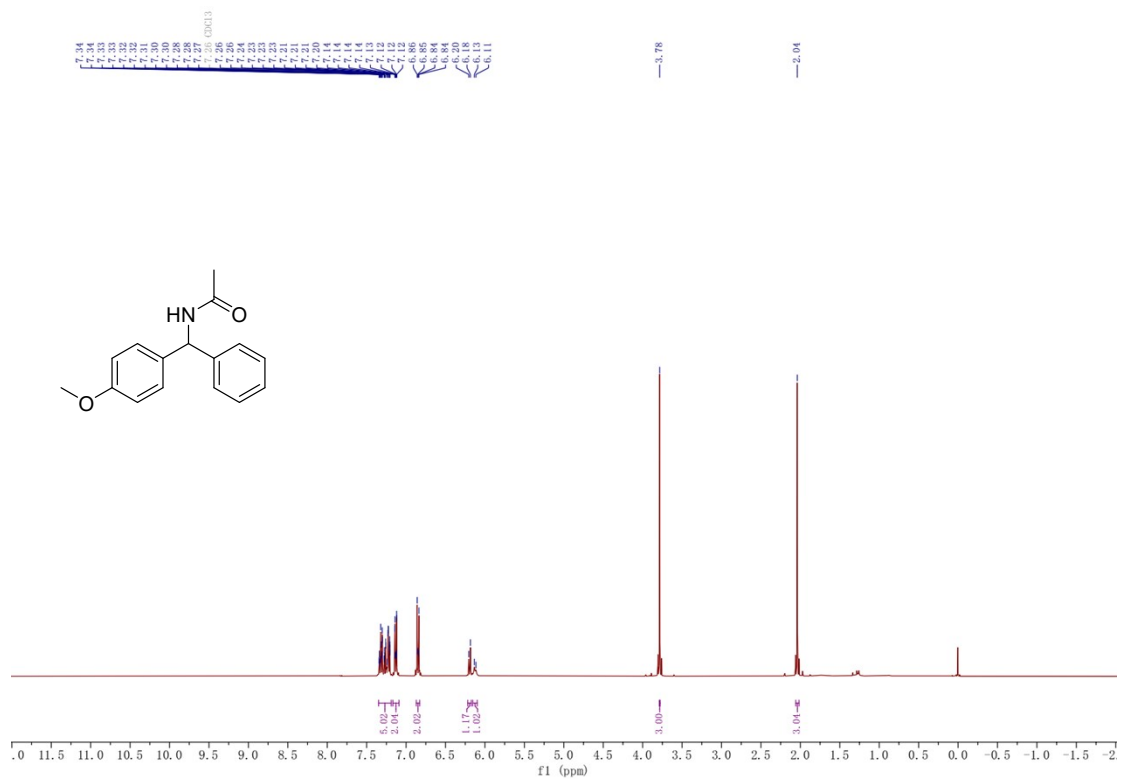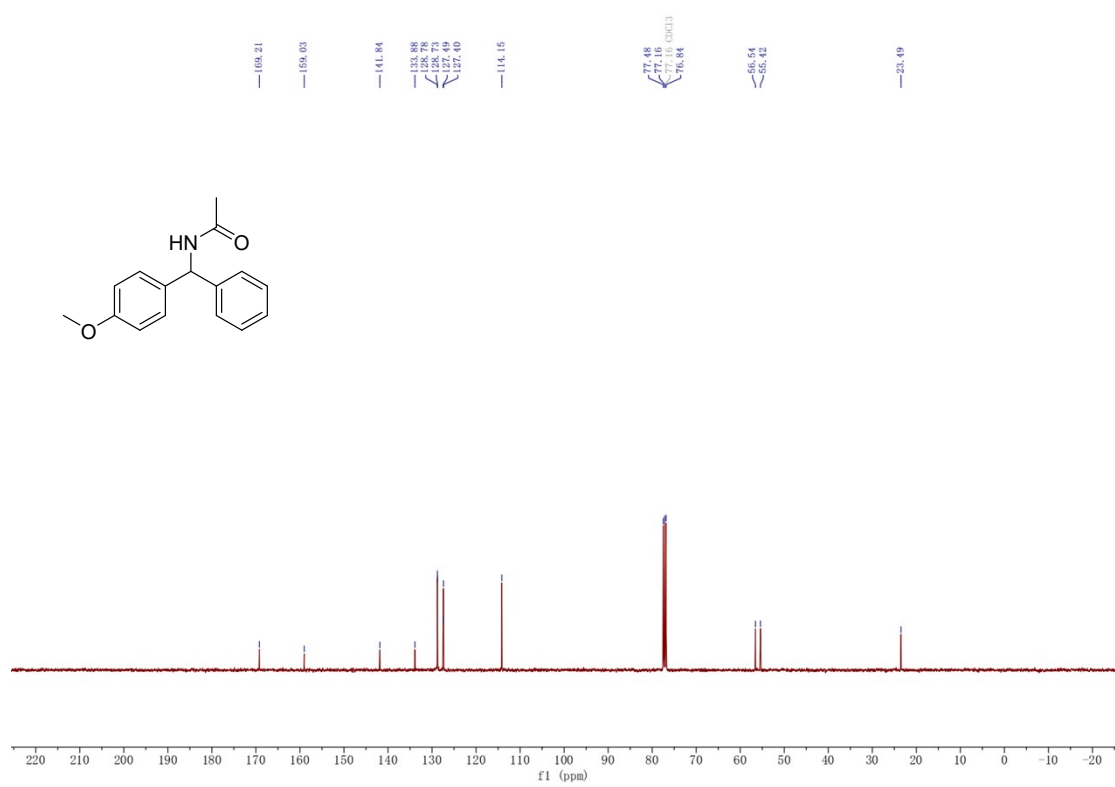

**Figure S19.**  $^1\text{H}$  (top) and  $^{13}\text{C}$  (bottom) NMR spectra of N-((4-methoxyphenyl)(phenyl)methyl)acetamide (table 2-20).

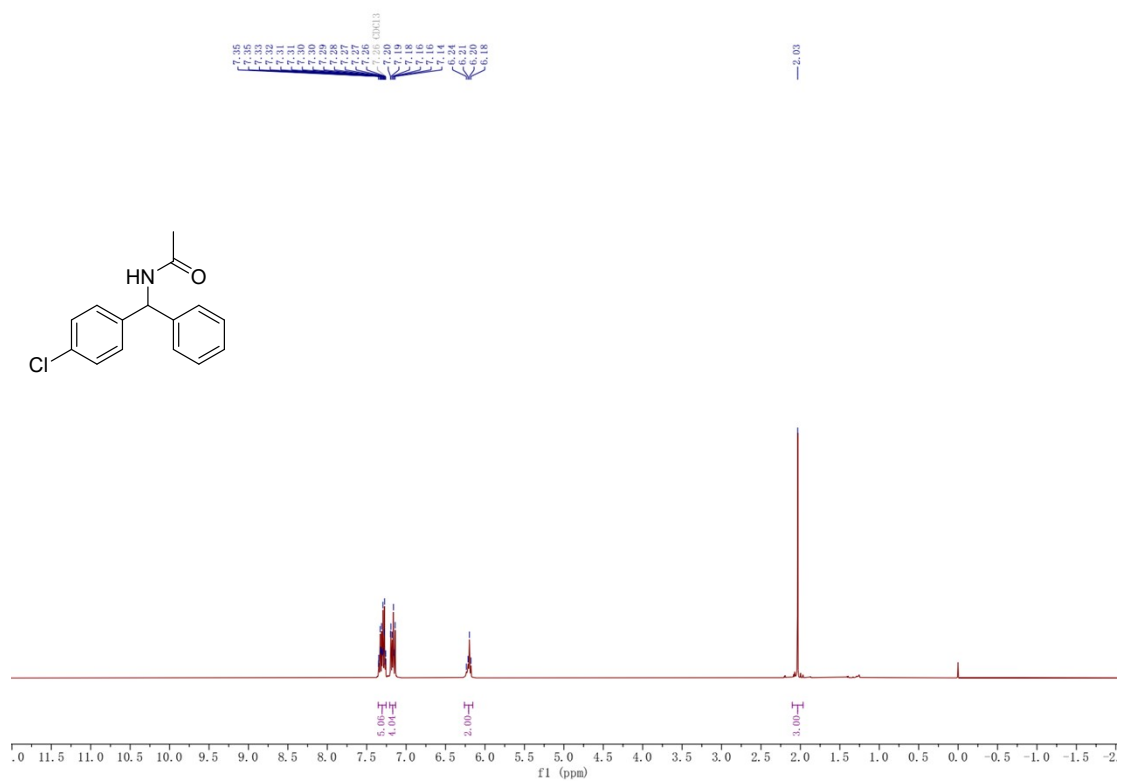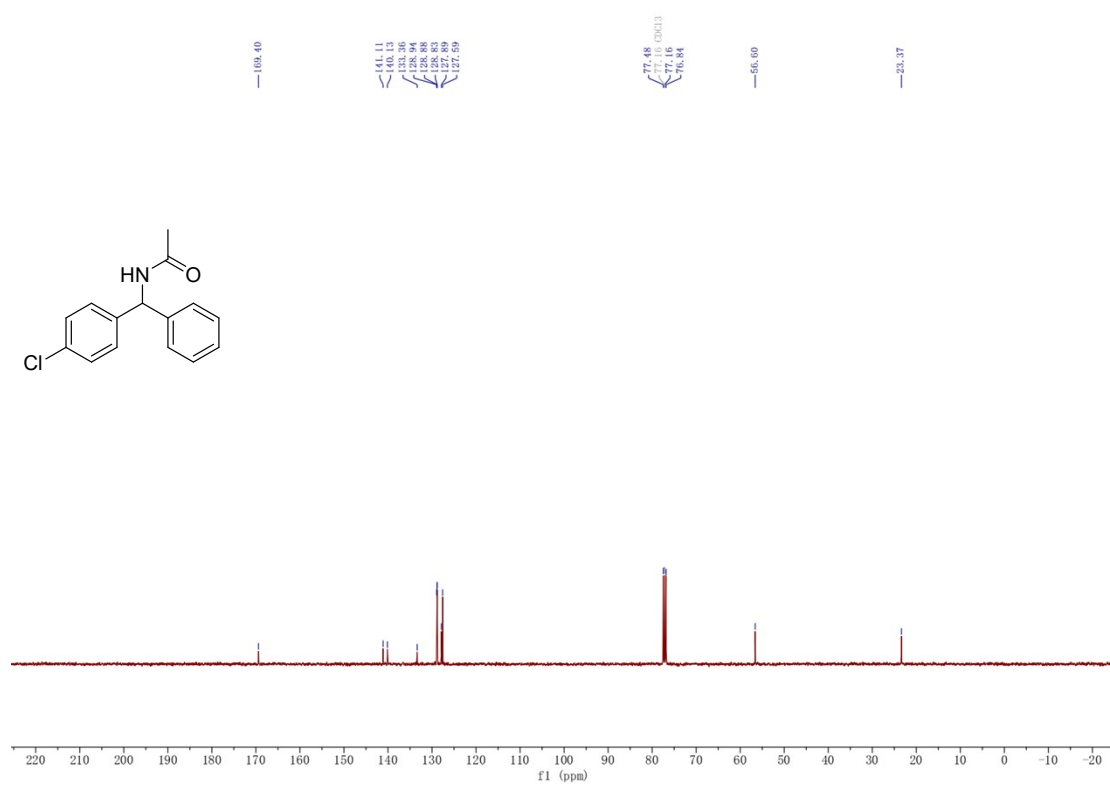

**Figure S20.** <sup>1</sup>H (top) and <sup>13</sup>C (bottom) NMR spectra of N-((4-chlorophenyl)(phenyl)methyl)acetamide (table 2-21).

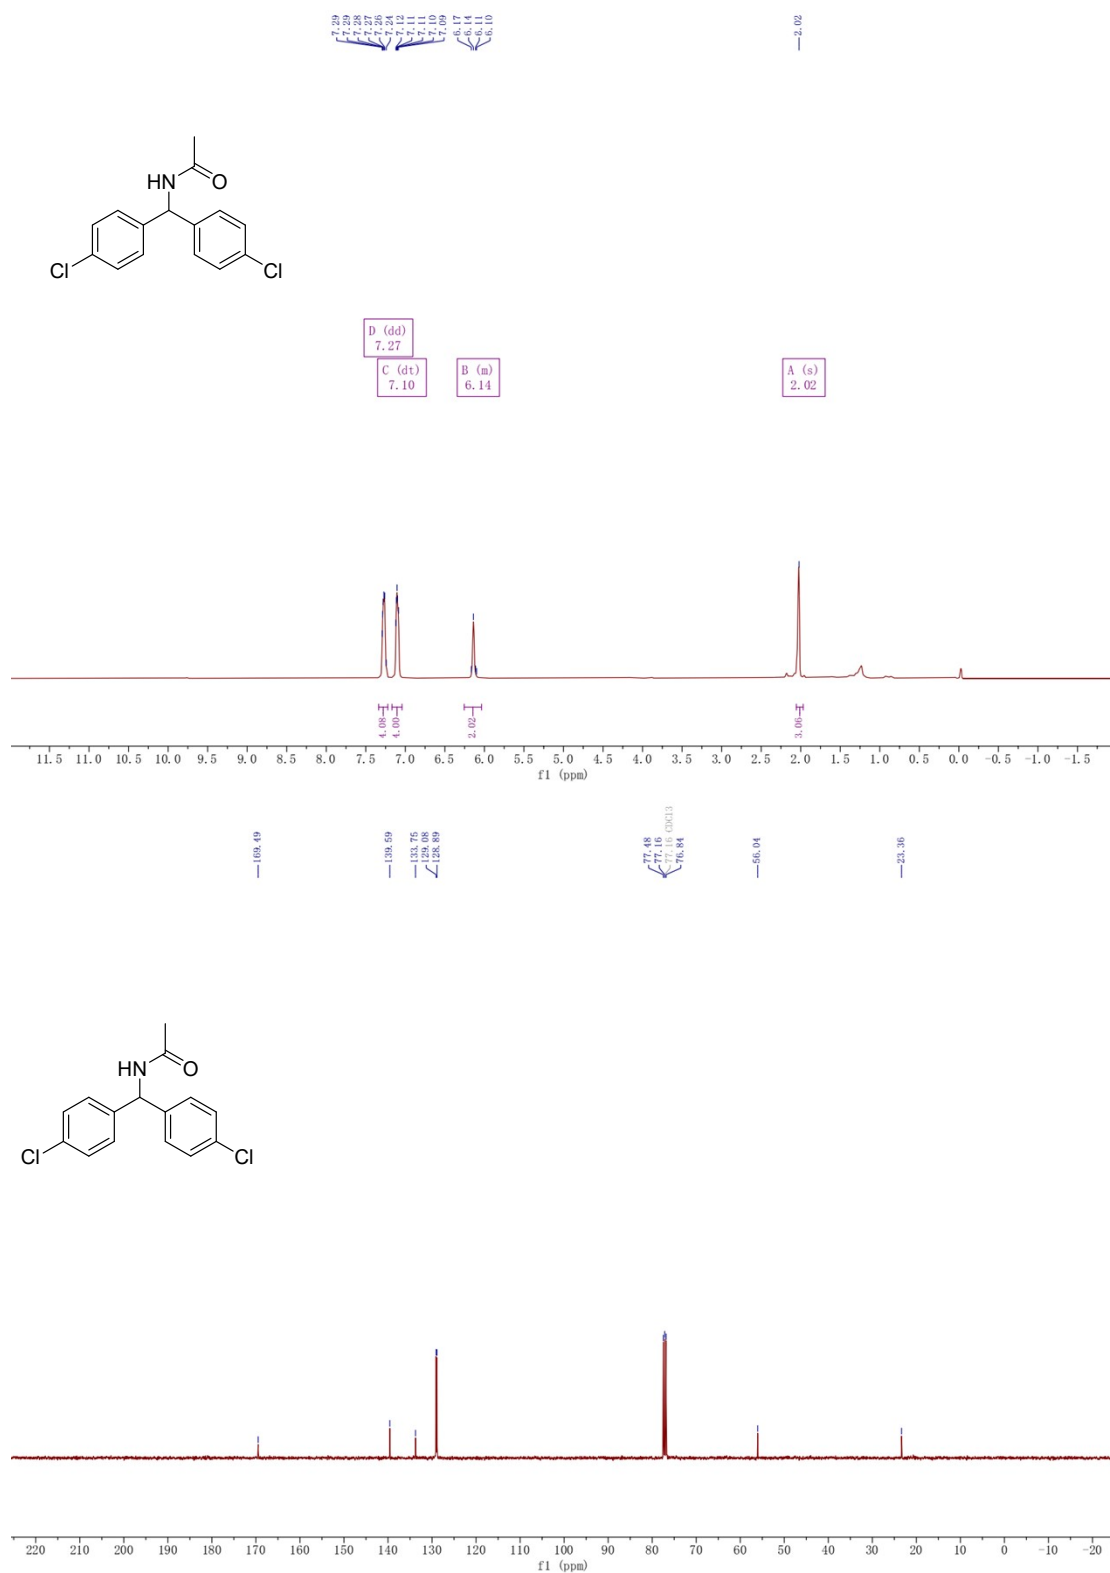

**Figure S21.** <sup>1</sup>H (top) and <sup>13</sup>C (bottom) NMR spectra of N-(bis(4-chlorophenyl)methyl)acetamide (table 2-22).

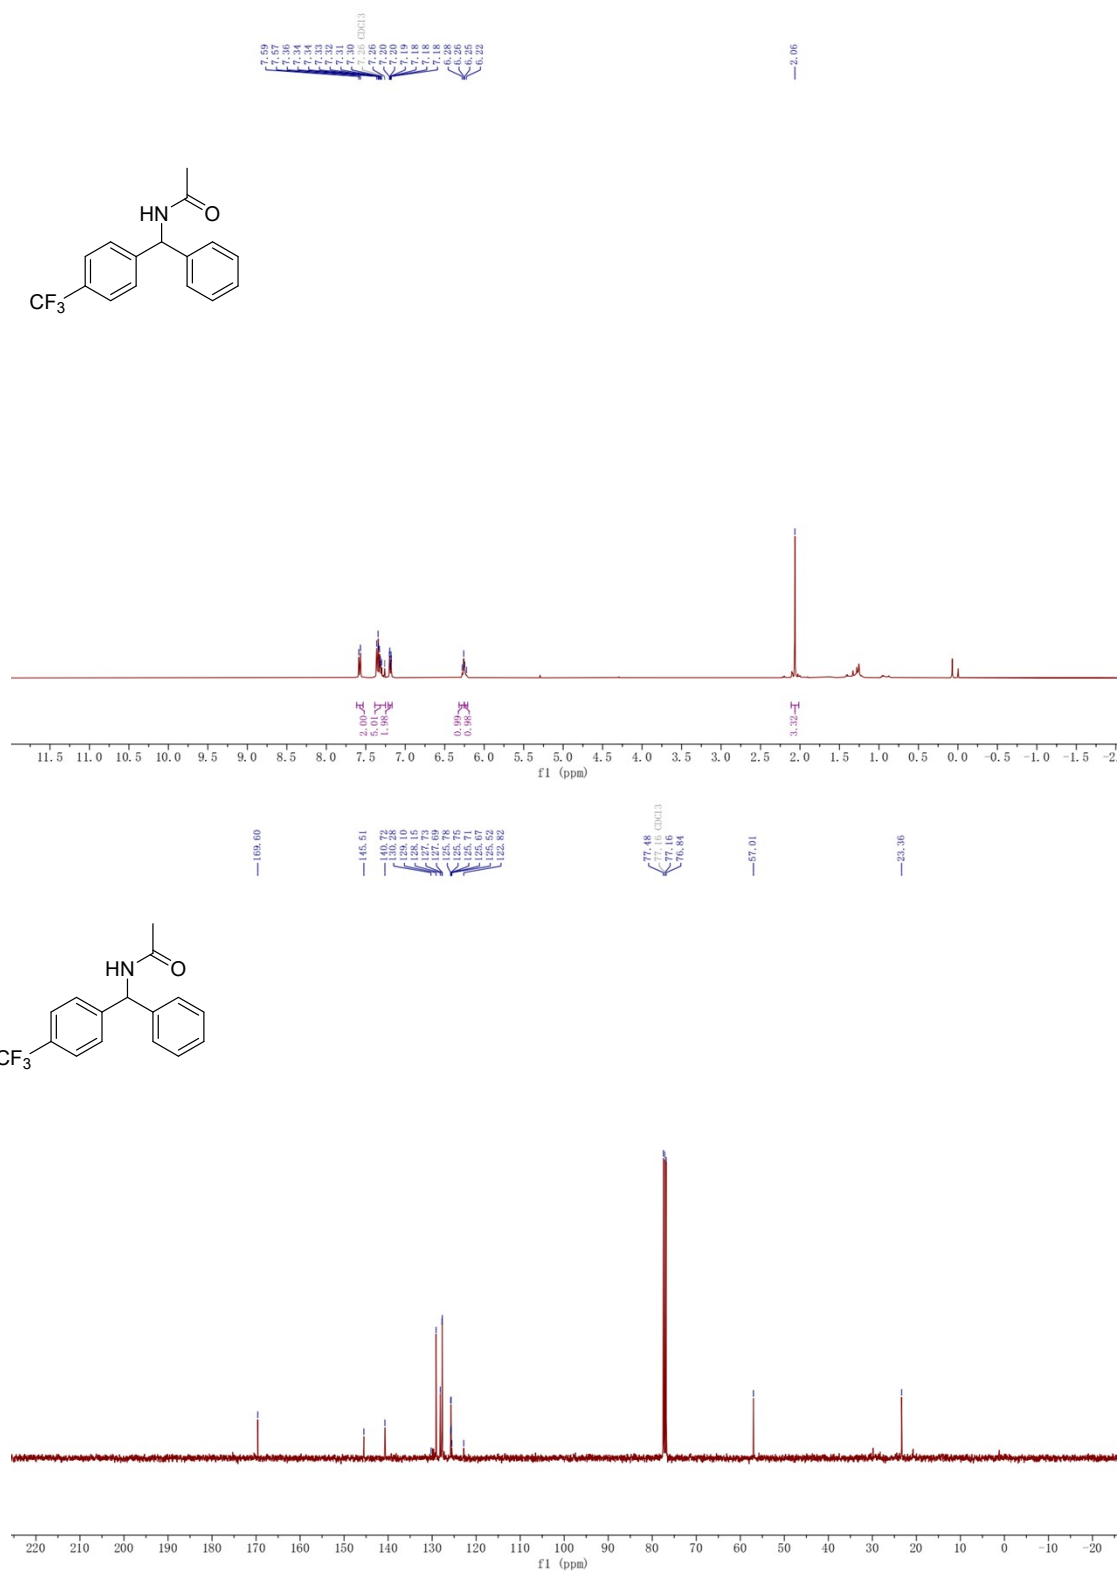

**Figure S22.** <sup>1</sup>H (top) and <sup>13</sup>C (bottom) NMR spectra of N-(phenyl(4-(trifluoromethyl)phenyl)methyl)acetamide (table 2-23).

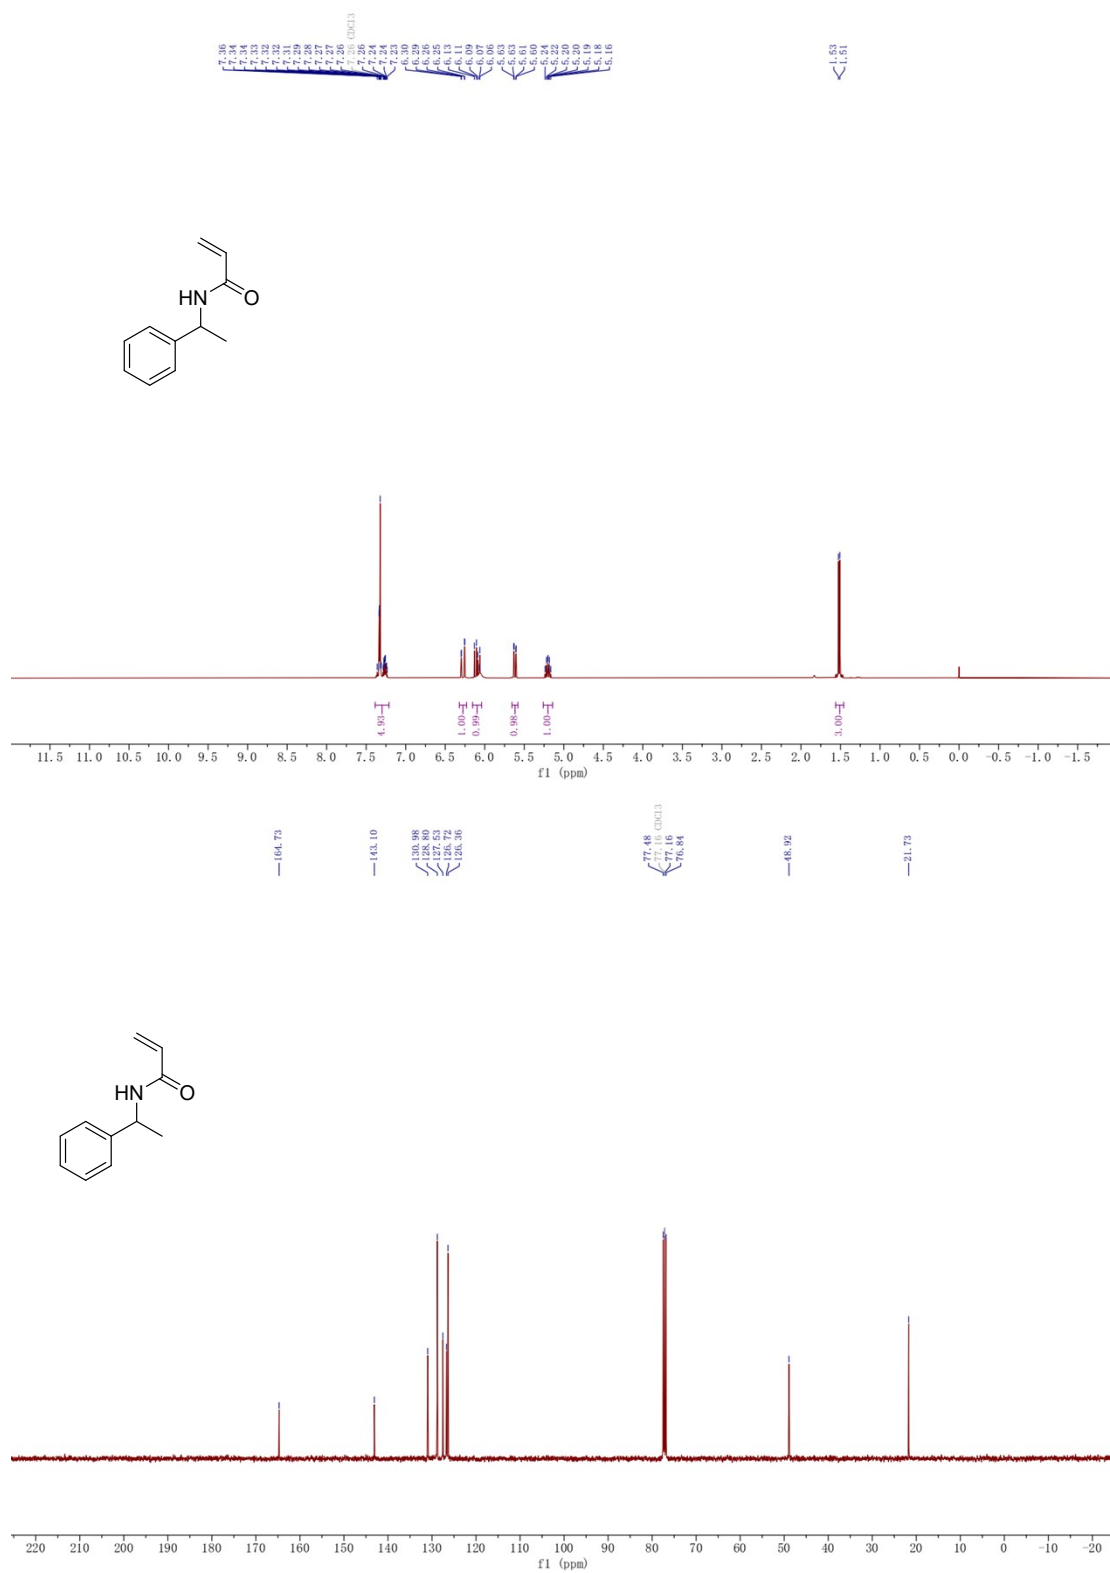

**Figure S23.** <sup>1</sup>H (top) and <sup>13</sup>C (bottom) NMR spectra of N-(1-phenylethyl) acrylamide (table 3-1).

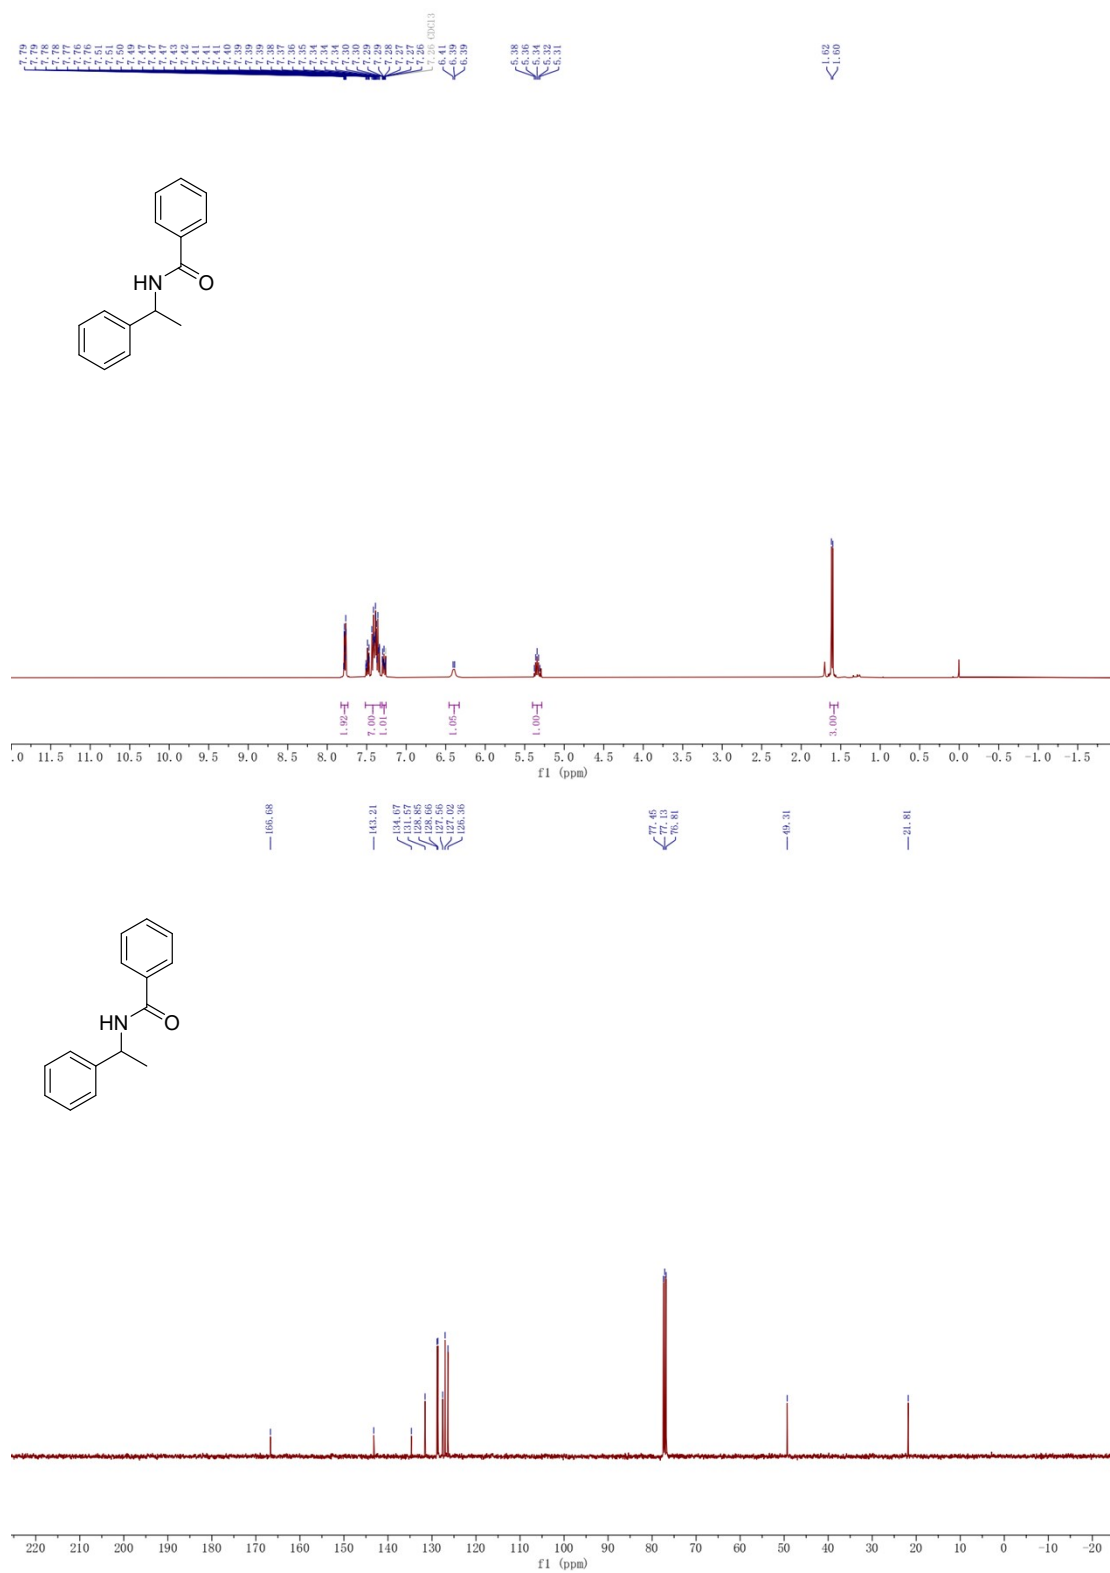

Figure S24. <sup>1</sup>H (top) and <sup>13</sup>C (bottom) NMR spectra of N-(1-phenylethyl)benzamide (table 3-2).



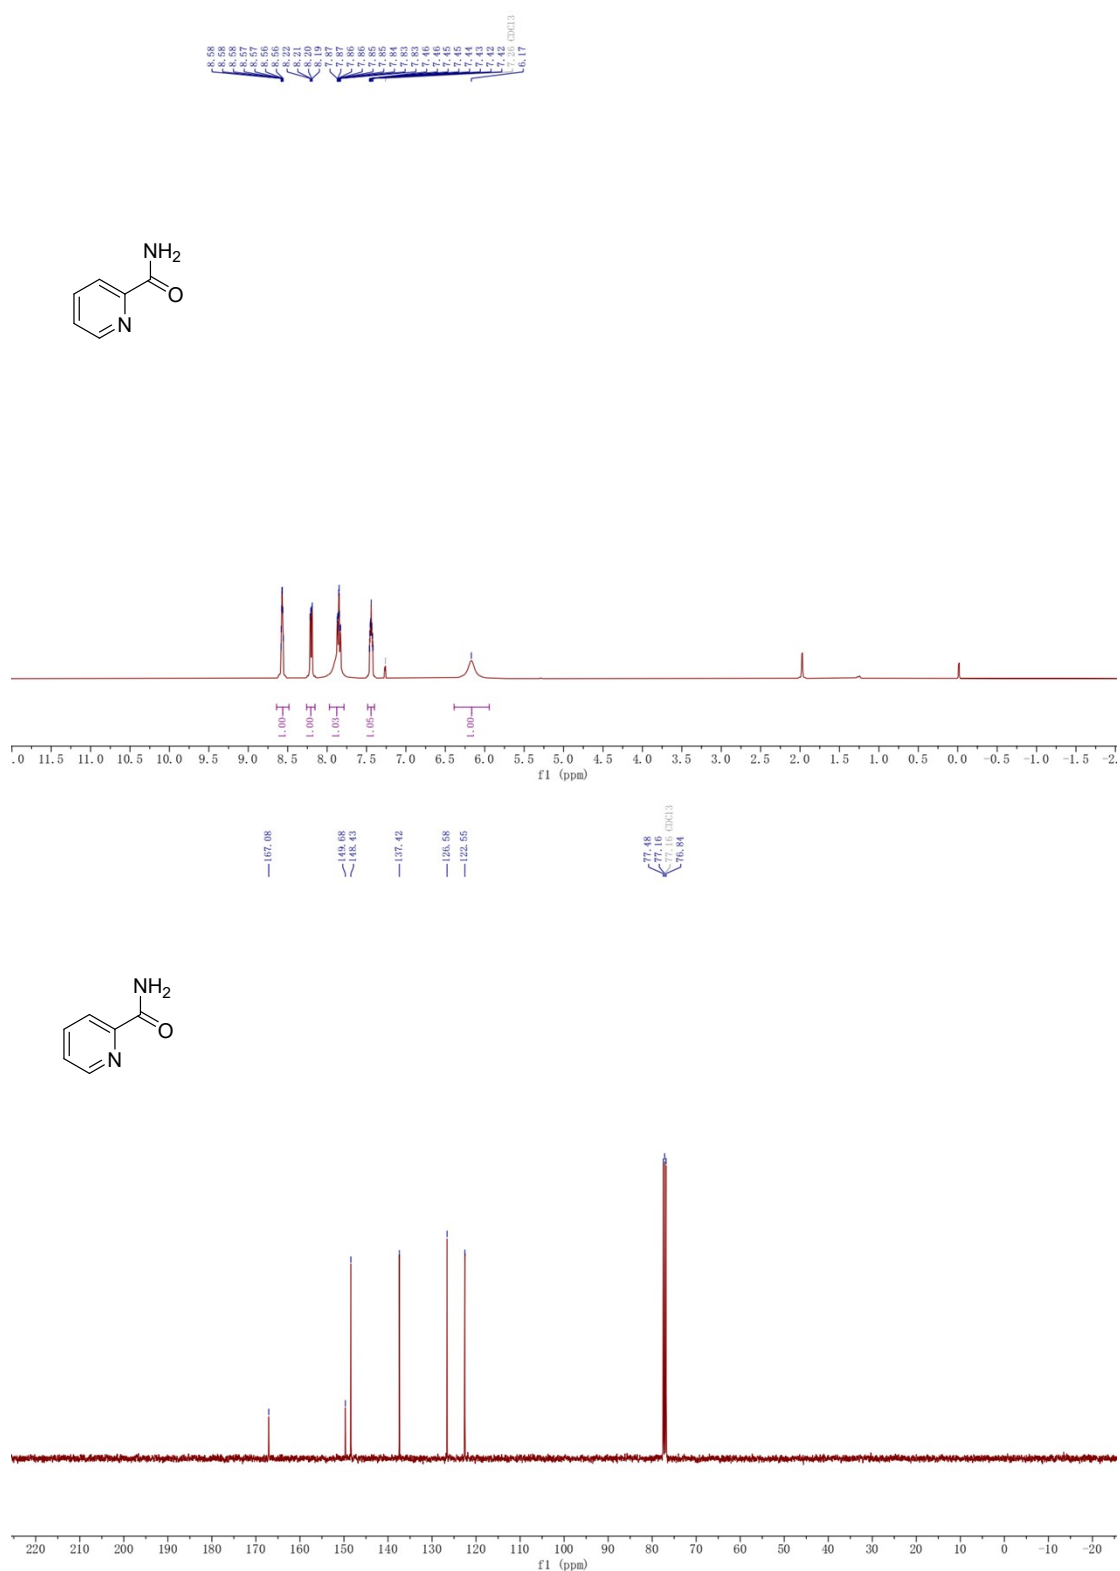

Figure S25. <sup>1</sup>H (top) and <sup>13</sup>C (bottom) NMR spectra of picolinamide (table 3-3).

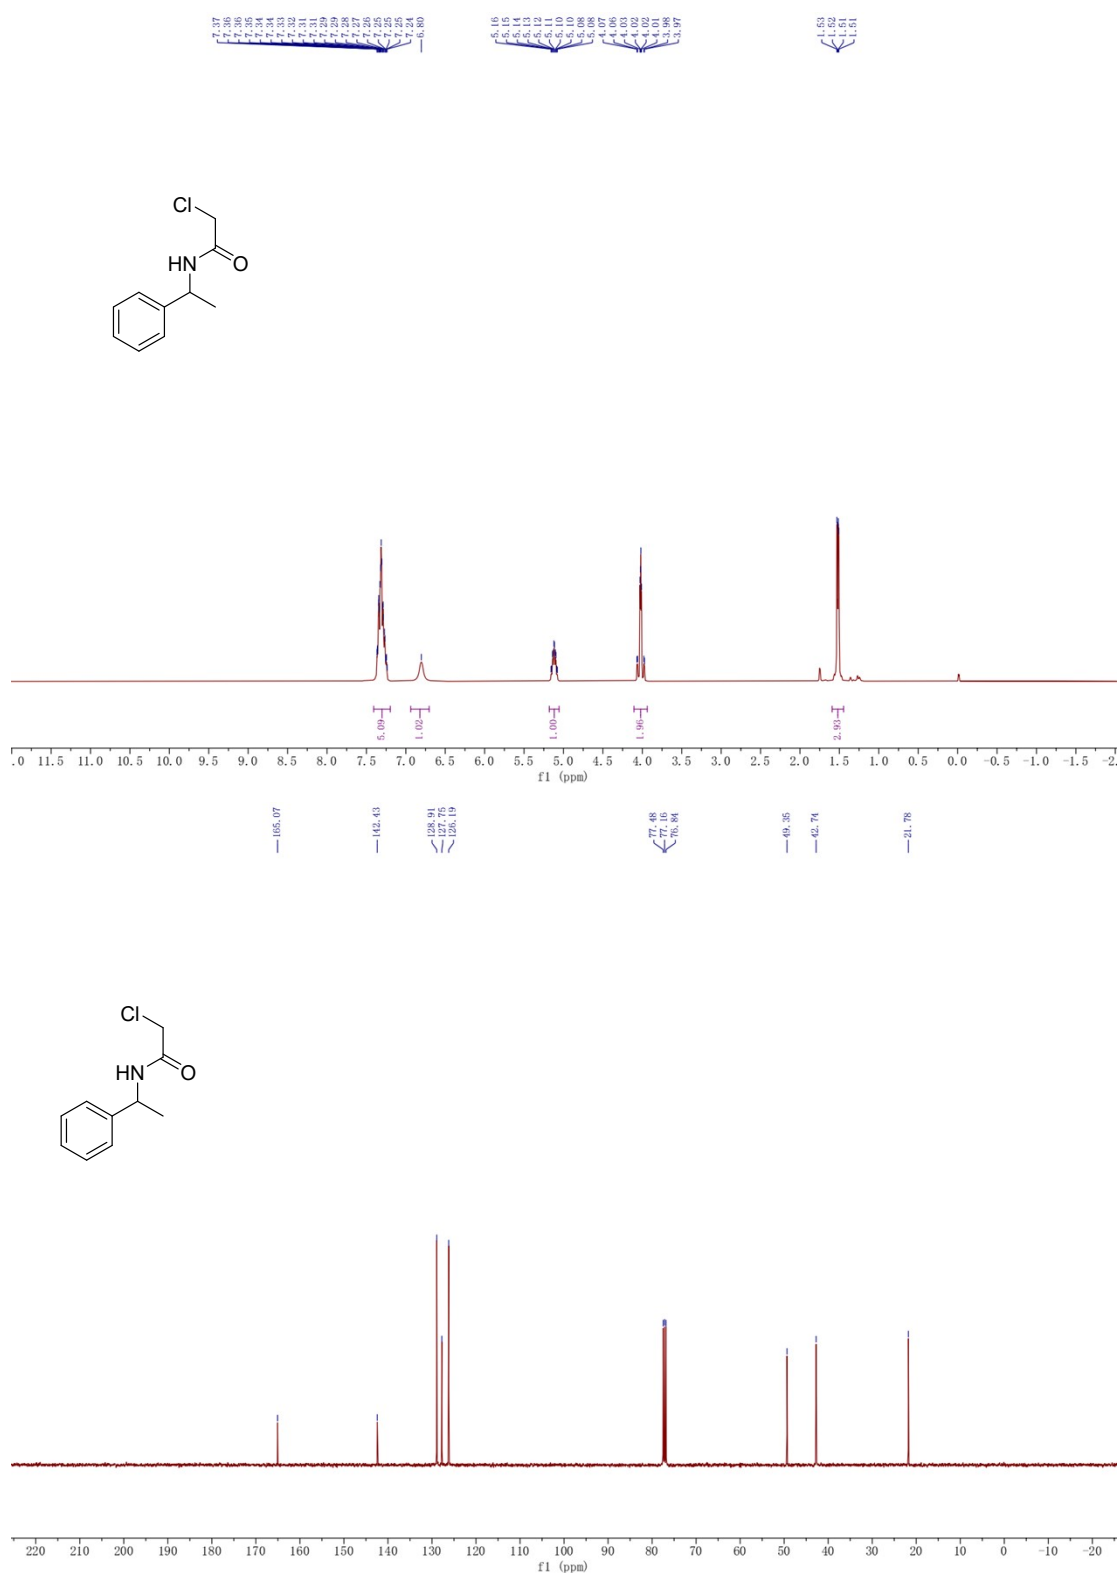

**Figure S26. <sup>1</sup>H (top) and <sup>13</sup>C (bottom) NMR spectra of 2-chloro-N-(1-phenylethyl)acetamide (table 3-4)**

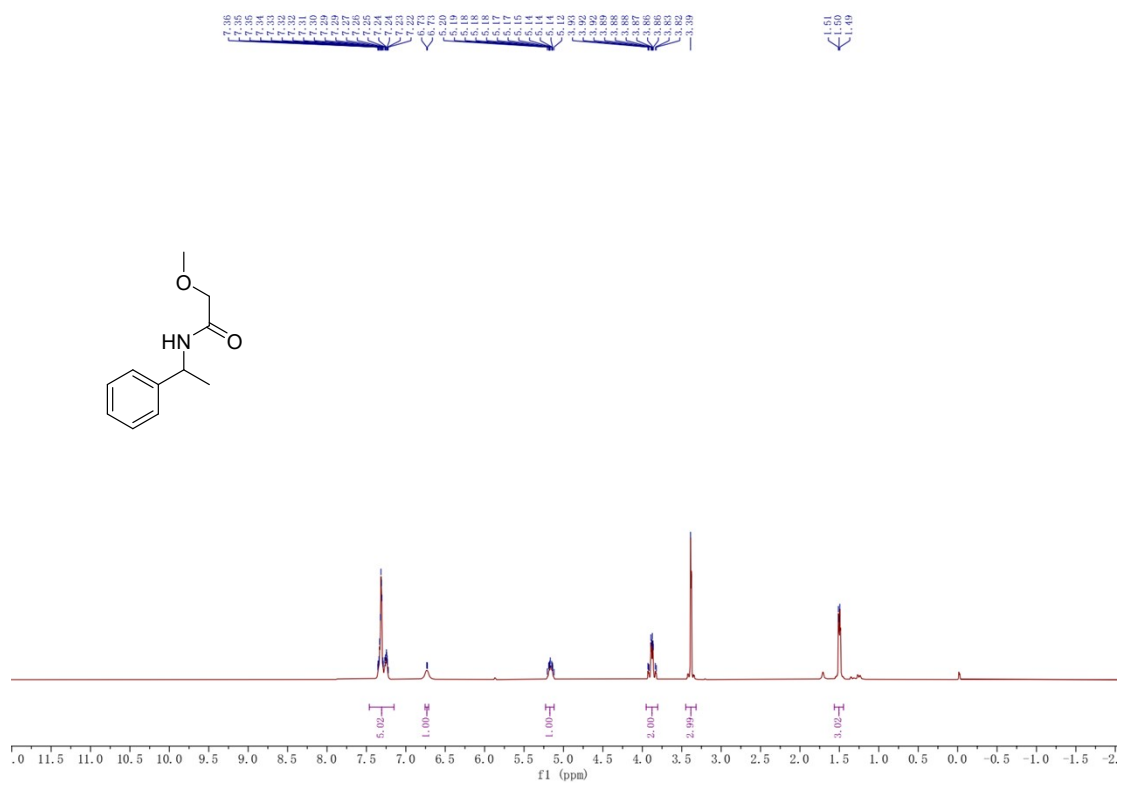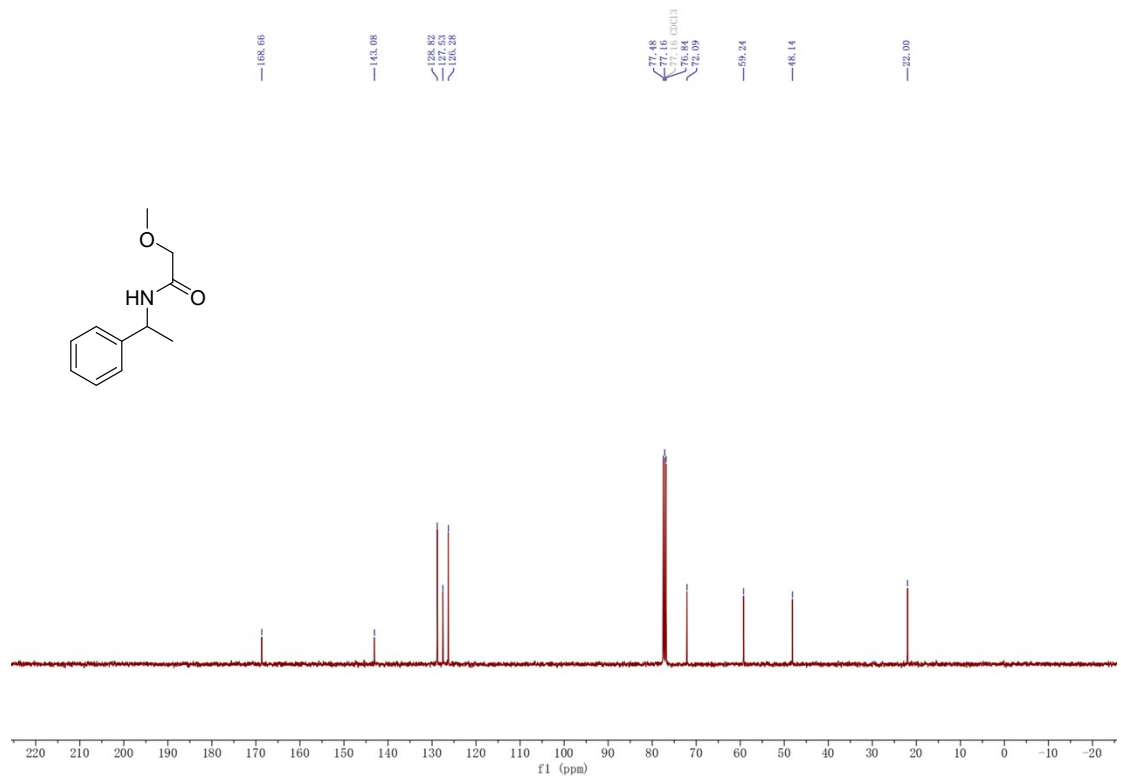

**Figure S27. <sup>1</sup>H (top) and <sup>13</sup>C (bottom) NMR spectra of 2-methoxy-N-(1-phenylethyl)acetamide(table 3-5).**
